# Supplementary material for: Promoter Activation in Δhfq Mutants as an Efficient Tool for Specialized Metabolite Production Enabling Direct Bioactivity Testing
Source: PubMed Central journal article supplement (PMC6972681; doi:10.1002/anie.201910563), 2019-12-12
Supplement: ANIE-58-18957-s001.pdf [file ANIE-58-18957-s001.pdf]

## Supporting Information

### **Promoter Activation in $\Delta hfq$ Mutants as an Efficient Tool for Specialized Metabolite Production Enabling Direct Bioactivity Testing**

*Edna Bode, Antje K. Heinrich, Merle Hirschmann, Desalegne Abebew, Yan-Ni Shi, Tien Duy Vo, Frank Wesche, Yi-Ming Shi, Peter Grün, Svenja Simonyi, Nadine Keller, Yvonne Engel, Sebastian Wenski, Reuel Bennet, Sophie Beyer, Iris Bischoff, Anthony Buaya, Sophie Brandt, Ibrahim Cakmak, Harun Çimen, Simone Eckstein, Denia Frank, Robert Fürst, Martin Gand, Gerd Geisslinger, Selcuk Hazir, Marina Henke, Ralf Heermann, Virginie Lecaudey, Wilhelm Schäfer, Susanne Schiffmann, Anja Schüffler, Rebecca Schwenk, Marisa Skaljic, Eckhard Thines, Marco Thines, Thomas Ulshöfer, Andreas Vilcinskas, Thomas A. Wichelhaus, and Helge B. Bode\**

anie\_201910563\_sm\_miscellaneous\_information.pdf

|                                                                                   |           |
|-----------------------------------------------------------------------------------|-----------|
| <b>Supplementary information</b>                                                  |           |
| <b>A. Materials and methods</b>                                                   | <b>3</b>  |
| 1. Cultivation of bacteria                                                        | 3         |
| 2. Cloning Methods                                                                | 4         |
| 2.1 Deletion of <i>hfq</i>                                                        | 4         |
| 2.2 Analysis of growth of WT and $\Delta hfq$ mutants                             | 6         |
| 2.3 Construction of promoter exchange mutants                                     | 6         |
| 3. Generation of extracts for activity tests                                      | 7         |
| 4. Analytical methods                                                             | 8         |
| 5. Stereochemistry assignment                                                     | 9         |
| 6. Bioactivity testing of extracts                                                | 9         |
| 6.1. Antimicrobial activity                                                       | 9         |
| 6.2 Quorum-quenching activity assay                                               | 13        |
| 6.3. Bioassays against higher eukaryotes                                          | 14        |
| 6.3.1. Zebrafish ( <i>Danio rerio</i> )                                           | 14        |
| 6.3.2. <i>Caenorhabditis elegans</i>                                              | 15        |
| 6.3.3. Mites ( <i>Tetranychus urticae</i> )                                       | 15        |
| 6.3.4. Aphids ( <i>Myzus persicae</i> )                                           | 16        |
| 6.4. Endothelial cells (EC)                                                       | 17        |
| 6.5. In vitro assays                                                              | 19        |
| <b>B. Supplementary Tables</b>                                                    | <b>22</b> |
| Supplementary Table 1. NPs mentioned in this work.                                | 22        |
| Supplementary Table 2. NMR spectroscopic data for szentirazine ( <b>14</b> ).     | 24        |
| Supplementary Table 3. MS data for all new NPs shown in Fig. 2d.                  | 25        |
| Supplementary Table 4. NMR spectroscopic data for pseudotetratide ( <b>33</b> ).  | 26        |
| Supplementary Table 5. Assays and organisms used for bioactivity testing.         | 27        |
| Supplementary Table 6. Wild type strains used in this work.                       | 28        |
| Supplementary Table 8. List of general plasmids used in this work.                | 28        |
| Supplementary Table 9. List of general primers used in this work.                 | 28        |
| <b>C. Supplementary Figures</b>                                                   | <b>29</b> |
| Supplementary Fig. 1. Structures of all NPs involved in the study.                | 30        |
| Supplementary Fig. 2. Comparison of growth of wild type and $\Delta hfq$ mutants. | 31        |
| Supplementary Fig. 3. New NRPS and BGCs identified in this work.                  | 32        |
| Supplementary Fig. 4. MS-MS analysis of <b>15a-c</b> .                            | 33        |
| Supplementary Fig. 5. Structure and key 2D NMR correlations of <b>14</b> .        | 34        |

|                                                                                                   |    |
|---------------------------------------------------------------------------------------------------|----|
| <b>Supplementary Fig. 6.</b> <sup>1</sup> H NMR spectrum of compound <b>14</b> .                  | 34 |
| <b>Supplementary Fig. 7.</b> HSQC spectrum of compound <b>14</b> .                                | 35 |
| <b>Supplementary Fig. 8.</b> COSY spectrum of compound <b>14</b> .                                | 35 |
| <b>Supplementary Fig. 9.</b> HMBC spectrum of compound <b>14</b> .                                | 36 |
| <b>Supplementary Fig. 10.</b> HPLC/MS data of wt and $\Delta hfq$ mutant of <i>X. doucetiae</i> . | 37 |
| <b>Supplementary Fig. 11.</b> HPLC/MS data of <i>X. nematophila</i> .                             | 38 |
| <b>Supplementary Fig. 12.</b> HPLC/MS data of <i>Photorhabdus</i> PB45.5.                         | 39 |
| <b>Supplementary Fig. 13.</b> HPLC/MS analysis of peptides <b>23</b> and <b>24</b> .              | 40 |
| <b>Supplementary Fig. 14.</b> HPLC/MS of <i>Xenorhabdus</i> KJ12.1 $\Delta hfq$ _PBAD_02330.      | 41 |
| <b>Supplementary Fig. 15.</b> MS data from <i>Xenorhabdus</i> KJ12.1 $\Delta hfq$ _PBAD_02330.    | 42 |
| <b>Supplementary Fig. 16.</b> MS-MS Fragmentation of <b>25a</b> .                                 | 43 |
| <b>Supplementary Fig. 17.</b> HPLC/MS data of <i>Ps. entomophila</i> .                            | 44 |
| <b>Supplementary Fig. 18.</b> Structure and key 2D NMR correlations of <b>33</b> .                | 45 |
| <b>Supplementary Fig. 19.</b> <sup>1</sup> H NMR spectrum of compound <b>33</b> .                 | 45 |
| <b>Supplementary Fig. 20.</b> <sup>13</sup> C NMR spectrum of compound <b>33</b> .                | 46 |
| <b>Supplementary Fig. 21.</b> HSQC spectrum of compound <b>33</b> .                               | 46 |
| <b>Supplementary Fig. 22.</b> HMBC spectrum of compound <b>33</b> .                               | 47 |
| <b>Supplementary Fig. 23.</b> COSY spectrum of compound <b>33</b> .                               | 47 |
| <b>Supplementary Fig. 24.</b> HPLC/UV analysis of xenorhabdins.                                   | 48 |
| <b>References</b>                                                                                 | 49 |

## A. Materials and methods

### 1. Cultivation of bacteria

All wild type strains are listed in Supplementary Table S6. Cultivation of *Photorhabdus* and *Xenorhabdus* strains was performed in LB medium on a rotary shaker or on LB-agar plates supplemented with antibiotics in appropriate concentrations (ampicillin 100 µg/ml, rifampicin 50 µg/ml, kanamycin 50 µg/ml, chloramphenicol 34 µg/ml) at 30 °C. Cultivation of production cultures of *Pseudomonas entomophila* was performed in 5 ml XPPM medium at 30 °C, inoculated with a 12 h LB pre-culture, on a rotary shaker at 200 rpm. If necessary cultures were induced with 0.2 % L-arabinose.

| medium |                              |                        |                                                                                      |
|--------|------------------------------|------------------------|--------------------------------------------------------------------------------------|
| LB     | LB (1 L)                     | 10 g                   | Trypton                                                                              |
|        |                              | 5 g                    | Yeast extract                                                                        |
|        |                              | 10 g                   | NaCl                                                                                 |
|        |                              | ad VE H <sub>2</sub> O |                                                                                      |
|        |                              | 15 g                   | Agar (optional)                                                                      |
| XPPM   | XPPM (1 L)                   | 10 g                   | Glycerol                                                                             |
|        |                              | 20 ml                  | M9 salt A                                                                            |
|        |                              | 20 ml                  | M9 salt B                                                                            |
|        |                              | 2 g                    | L-amino acid mix                                                                     |
|        |                              | 1 g                    | Sodium pyruvate                                                                      |
|        |                              | ad VE H <sub>2</sub> O |                                                                                      |
|        |                              | autoclaved             |                                                                                      |
|        |                              | 2 ml                   | Vitamin solution                                                                     |
|        |                              | 1 ml                   | Trace element solution                                                               |
|        | M9 salt A (1 L)              | 350 g                  | K <sub>2</sub> HPO <sub>4</sub>                                                      |
|        |                              | 100 g                  | KH <sub>2</sub> PO <sub>4</sub>                                                      |
|        | M9 salt B (1 L)              | 29.4 g                 | Sodium citrate                                                                       |
|        |                              | 50 g                   | (NH <sub>4</sub> ) <sub>2</sub> SO <sub>4</sub>                                      |
|        |                              | 5 g                    | MgSO <sub>4</sub>                                                                    |
|        | Trace element solution (1 L) | 40 mg                  | ZnCl <sub>2</sub>                                                                    |
|        |                              | 200 mg                 | FeCl <sub>3</sub> x 6 H <sub>2</sub> O                                               |
|        |                              | 10 mg                  | CuCl <sub>2</sub> x 2 H <sub>2</sub> O                                               |
|        |                              | 10 mg                  | MnCl <sub>2</sub> x 4 H <sub>2</sub> O                                               |
|        |                              | 10 mg                  | Na <sub>2</sub> B <sub>4</sub> O <sub>7</sub> x 10 H <sub>2</sub> O                  |
|        |                              | 10 mg                  | (NH <sub>4</sub> ) <sub>6</sub> Mo <sub>7</sub> O <sub>24</sub> x 4 H <sub>2</sub> O |
|        |                              | ad VE H <sub>2</sub> O |                                                                                      |
|        | Vitamine solution (1 L)      | 10 mg                  | Folic acid                                                                           |
|        |                              | 6 mg                   | Biotin                                                                               |
|        |                              | 200 mg                 | p-Aminobenzoic acid                                                                  |
|        |                              | 1 g                    | Thiamin hydrochloride                                                                |
|        |                              | 1.2 g                  | Pantothenic acid                                                                     |
|        |                              | 100 mg                 | Riboflavin                                                                           |
|        |                              | 2.3 g                  | Nicotinic acid                                                                       |
|        |                              | 12 g                   | Pyridoxin hydrochloride                                                              |
|        |                              | 20 mg                  | Vitamin B12                                                                          |
|        |                              | ad VE H <sub>2</sub> O |                                                                                      |

|     |                  |     |                 |
|-----|------------------|-----|-----------------|
|     | L-amino acid mix | 2 g | L-alanine       |
|     |                  | 2 g | L-arginine      |
|     |                  | 2 g | L-aspartate     |
|     |                  | 2 g | L-asparagine    |
|     |                  | 2 g | L-cysteine      |
|     |                  | 2 g | L-glutamate     |
|     |                  | 2 g | L-glutamine     |
|     |                  | 2 g | L-glycine       |
|     |                  | 2 g | L-histidine     |
|     |                  | 2 g | L-isoleucine    |
|     |                  | 2 g | L-leucine       |
|     |                  | 2 g | L-lysine        |
|     |                  | 2 g | L-methionine    |
|     |                  | 2 g | L-phenylalanine |
|     |                  | 2 g | L-proline       |
| 2 g | L-serine         |     |                 |
| 2 g | L-threonine      |     |                 |
| 2 g | L-tyrosine       |     |                 |

## 2. Cloning Methods

### 2.1 Deletion of *hfq*

The deletion of *hfq* in PB45.5, *X. doucetiae*, *X. szentirmaii* and *X. nematophila* was performed as described [1].

#### ***Photorhabdus* PB45.5- $\Delta$ *hfq***

For the amplification of the 1016 bp upstream fragment and the 979 bp downstream fragment for the construction of the deletion plasmid primers AHp312/AHp313 and AHp314/AHp315 were used.

The plasmid pDelta\_PB455\_*hfq* was assembled from the *Pst*I/*Bgl*II linearized vector pCKcipB and both PCR-products via Hot Fusion Cloning [2]. After the second homologous recombination loss of *hfq* was verified using genomic DNA as a template with AHp316/AHp317 and AHp318/AHp319 yielding different length PCR products for the WT and the desired deletion mutant (PB45.5 WT: 859 bp, PB45.5 $\Delta$ *hfq*: 550 bp) and (PB45.5 WT: 2335 bp, PB45.5 $\Delta$ *hfq*: 2026 bp).

#### ***X. doucetiae*- $\Delta$ *hfq***

For the deletion of *hfq* in *X. doucetiae* an upstream fragment of 1010 bp and a downstream fragment of 881 bp was generated with primers DA\_03-fw/DA\_04-rv and DA\_01-fw/DA\_02-rv. The fragments were fused via PCR and subsequently cloned into pEB17 (restricted with *Pst*I and *Bgl*II) via Hot Fusion cloning [2]. The deletion plasmid pEB17\_DSM17909 $\Delta$ *hfq* was transformed into *X. doucetiae* via conjugation. After the

second homologous recombination the deletion of *hfq* was verified using primers V\_DA\_05-fw/VPEB\_290-rv and VP\_DA\_06-rv/VPEB\_289-fw.

### ***X. nematophila-Δhfq***

For the deletion of *hfq* in *X. nematophila* an upstream fragment was amplified with primers NNp13 and NNp14. The downstream fragment was generated with AHp158 and AHp159. The fragments were fused via PCR and subsequently cloned into pCKcipB (restricted with *Pst*I and *Bgl*II) via hot fusion cloning. The deletion plasmid pCKcipB\_DeltaXNC1\_0455 was transformed into *X. nematophila* via conjugation. After the second homologous recombination the deletion of *hfq* in *X. nematophila* was verified using primers delta\_hfq\_\_XNC1\_mut\_ver\_fw2 and delta\_hfq\_\_XNC1\_mut\_ver\_rev2.

### ***X. szentirmaii-Δhfq***

For the deletion of *hfq* in *X. szentirmaii* an upstream fragment was generated with primers ΔXSZ\_hfq\_up\_PstI-Gib\_fw and ΔXSZ\_hfq\_up\_Gib\_rev. The downstream fragment was generated with ΔXSZ\_hfq\_do\_Gib\_fw and ΔXSZ\_hfq\_do\_BglII-Gib\_rev. The fragments were fused via PCR and subsequently cloned into pCK\_cipB (linearized with *Pst*I and *Bgl*II) via Hot Fusion cloning. The deletion plasmid pCK\_cipB\_Δhfq\_XSZ (pNN06) was transformed into *X. szentirmaii* via conjugation. After the second homologous recombination the deletion of *hfq* in *X. szentirmaii* was verified using primers delta\_hfq\_\_XSZ\_mut\_ver\_fw2 and delta\_hfq\_\_XSZ\_mut\_ver\_rev2.

### ***Ps. entomophila-Δhfq***

For the deletion of *hfq* in *Ps. entomophila* an upstream fragment was generated with primers PEB\_534-fw and PEB\_535-rv. With primers PEB\_536-fw and PEB\_537-rv the downstream fragment was amplified. The fragments were fused via PCR and subsequently cloned into pEB17 digested with *Pst*I and *Bgl*II. The deletion plasmid pEB17\_Pseen\_Δhfq was transformed into *Ps. entomophila* via biparental conjugation as described before<sup>[3]</sup>. *Ps. entomophila-Δhfq* mutants were verified by PCR using primers VPEB\_538-fw and VPEB\_539-rv.

## 2.2 Analysis of growth of wild type and $\Delta hfq$ mutants

For growth comparison of wild type and  $\Delta hfq$  mutant strains, overnight cultures of all strains grown in LB medium were adjusted to OD<sub>600</sub> of 0.1. For *Ps. entomophila* XPP medium was used. Cultivation was performed in 180  $\mu$ l culture volume in GRE96ft microtiter plates (Greiner) in triplicates. Incubation was carried out for 22 hours in a Spark® TECAN reader at 30 °C with shaking at 510 rpm. Optical density was measured every 20 min.

## 2.3 Construction of promoter exchange mutants

The vectors for promoter exchange were constructed as described earlier <sup>[4]</sup>. Briefly, the first 600-800 base pairs of the target gene were amplified with the corresponding primers all listed in Supplementary Table 7. The resulting fragment was cloned into pCEP (Supplementary Table 8) behind the P<sub>BAD</sub> promoter via following methods 1-5 (resulting plasmid constructs are listed in Supplementary Table 7):

**Method 1:** The vector pCEP-KM (Supplementary Table 8) was digested with *Nde*I and *Pst*I and assembled with the according insert via Hot Fusion Cloning <sup>[2]</sup>.

**Method 2:** pCEP-KM was linearized with *Nde*I and *Xba*I and fused with PCR amplified fragments of the respective biosynthetic gene via Hot Fusion Cloning.

**Method 3:** A pCEP-KM backbone was generated with the oligonucleotides pCEP\_fw\_gib and pCEP\_rv\_gib and assembled with the according insert via Gibson assembly. This was done with the Gibson Assembly Kit (New England BioLabs) following the manufacturer's instructions.

**Method 4:** A pCEP-KM backbone was generated with the oligonucleotides pCEP\_fw\_gib and pCEP\_rv\_gib (Supplementary Table 9) and assembled with the according insert via Hot Fusion.

**Method 5:** The vector pCEP or pCEP-KM was linearized using *Nde*I and *Sac*I restriction enzymes. PCR products were restricted with *Nde*I and *Sac*I and ligated with the linearized vector.

Ligated constructs were transformed into *E. coli* S17-1 $\lambda$ pir that were plated on selective LB-Agar with kanamycin 50  $\mu$ g/ml. The resulting clones were analyzed via colony PCR with verification primers V-pCEP-fw and V-pDS132-rv (Supplementary Table 9). Positive clones were used for conjugation with the  $\Delta$ hfq strains. Conjugation was performed as described [4]. Briefly, from overnight cultures of the  $\Delta$ hfq strain (acceptor) and *E. coli* S17-1 $\lambda$ pir mutant strain (donor) fresh LB media was inoculated. Cultures were grown to an OD<sub>600</sub> of 0.6-1.0. One ml of each, donor and acceptor strain was collected and cells were washed in LB medium if necessary. After pelleting via centrifugation cells were resuspended in 400  $\mu$ l LB medium. For mating procedure, acceptor and donor were combined in a ratio of 1:3 and dropped on LB agar plates. After incubation at 37°C for the first three hours, plates were shifted to 30°C and incubated for 21h. The cells were scraped off and resuspended in 2 ml LB medium. Different volumes of the cell suspension were spread on selective LB agar plates containing ampicillin 100  $\mu$ g/ml and kanamycin 50  $\mu$ g/ml for *Xenorhabdus* strains and *Ps. entomophila*. For *Photorhabdus* strains rifampicin 50  $\mu$ g/ml and kanamycin 50  $\mu$ g/ml were used. Cells were incubated at 30°C for 24-72 h. Potential clones were analyzed with V-pCEP-fw and the respective verification primer (Supplementary Table 7 and 9).

The conjugation of *Ps. entomophila* was performed as described in [3,5].

For the swarming assay for *P. entomophila*, 5  $\mu$ l of 12 h LB-cultures were dropped on LB-plates (Agar 0.5%, w/v). The plates were incubated at 30 °C for 12 h. Swarming behavior was determined after 24 h.

### **3. Generation of extracts for activity tests**

All production cultures were cultivated in 1 l Erlenmeyer flasks containing 100 ml Luria-Bertani (LB) broth (pH 7.0) + 0,2% L-arabinose and inoculated with a 24 h pre-culture (0.1 %, v/v). For the pre-culture appropriate antibiotics were added to LB liquid when necessary at following concentrations: kanamycin 50  $\mu$ g/ml and chloramphenicol 34  $\mu$ g/ml. The cultures were cultivated at 30°C for 48 h and 140 rpm on a rotary shaker. The culture supernatant was separated from the cells by centrifugation for 20 min at 4000 rpm in an Eppendorf centrifuge in 50 ml Falcon tubes. 100 ml supernatant was lyophilized. The lyophilisate was dissolved in 10 ml deionised sterile water. The obtained 10-fold concentrated supernatants were either used directly or diluted according to the assay performed.



#### 4. Analytical methods

HPLC/MS analysis of extracts, MS-MS fragmentation analysis and labelling experiments for MS-based structure elucidation of new NPs were all performed as described previously [6].

$^1\text{H}$ ,  $^{13}\text{C}$ , HSQC, HMBC,  $^1\text{H}$ - $^1\text{H}$  COSY, and ROESY spectra were measured on a Bruker AV500 spectrometer, using DMSO as solvent. Coupling constants are expressed in Hz and chemical shifts are given on a ppm scale. HRESIMS was performed on an UltiMate 3000 system (Thermo Fisher) coupled to an Impact II qToF mass spectrometer (Bruker Daltonik GmbH). Column chromatography was performed with sephadex LH-20 (25–100  $\mu\text{m}$ , Pharmacia Fine Chemical Co. Ltd.). Preparative HPLC was performed on an Agilent 1260 liquid chromatograph with a ZORBAX StableBond 300 C18 (30 mm  $\times$  250 mm, 7.0 $\mu\text{m}$ , Agilent). Semi-preparative HPLC was performed on an Agilent 1260 liquid chromatograph with a ZORBAX StableBond 300 C18 (9.4 mm  $\times$  250 mm, 5.0 $\mu\text{m}$ , Agilent).

Isolation of szentirazine (**13**) and pseudotetrapeptide (**33**) was performed as follows: *X. szentirmaii*  $\Delta hfq$  pCEP-KM-1979 (producer of **13**) was cultured in LB (6L) with 2% XAD<sup>®</sup> resin at 30 °C for three days. The resin was extracted exhaustively with methanol (3  $\times$  2 L) at room temperature. The methanol extract was concentrated under reduced pressure to give 3.4g of a brown gum.

For isolation of pseudotetrapeptide (**33**), *Ps. entomophila*  $\Delta hfq$   $P_{BAD\#7}$  was cultivated in XPP medium (6 x 1L) with addition of 2 % XAD-16<sup>®</sup> resin. The media were inoculated with 10 mL 12 h LB –culture of *Ps. entomophila*  $\Delta hfq$   $P_{BAD\#7}$  and induced with 0.2 % L-arabinose. The cultures were cultivated for 48 h at 30 °C on a rotary shaker with 130 rpm. Repeated extraction of the XAD-bound crude extract was performed with methanol (3 L in total). The organic phase was concentrated under reduced pressure to give 318.2 mg brown extract.

The residue (3.4 g) of cultivated *X. szentirmaii*  $\Delta hfq$  pCEP-KM-1979 was subjected to Sephadex LH-20 (eluted with MeOH) to obtain eight fractions 1-8. Fraction 7 (58 mg) was separated by using semi-preparative HPLC with a gradient mobile from 20% to 33% ACN in H<sub>2</sub>O (v/v) in 30 min to yield **1** (2.4 mg). The crude extraction (318.2 mg) *P. entomophila*  $\Delta hfq$   $P_{BAD\#7}$  was separated by using preparative HPLC with a gradient mobile from 5% to 40% ACN in H<sub>2</sub>O (v/v) in 30 min and further purified by semi-

preparative HPLC with a gradient from 10% to 30% ACN in H<sub>2</sub>O (v/v) in 25 min to yield **2** (3.1 mg). Both of the ACN and H<sub>2</sub>O used contained 0.1% formic acid.

## 5. Stereochemistry assignment

Compound **14** had a molecular formula of C<sub>16</sub>H<sub>15</sub>N<sub>5</sub>O<sub>4</sub>, as deduced from HR-ESI-MS at *m/z* 340.1056 [M-H]<sup>-</sup> (calcd for C<sub>16</sub>H<sub>14</sub>N<sub>5</sub>O<sub>4</sub>, 340.1051). By careful comparison, part of compound **14** was similar with dipodazine<sup>[7]</sup> (Supplementary Table 2). Combined with HMBC spectrum (from δ<sub>H</sub> 11.66 to δ<sub>C</sub> 136.1 and 127.5), the exchangeable signal at δ 11.66 was attributed to an indole NH. The linkage of the side chain was elucidated by <sup>1</sup>H-<sup>1</sup>H COSY (Supplementary Fig. 1.) correlations of NH-1 (δ<sub>H</sub> 8.22)/H-6 (δ<sub>H</sub> 4.44)/H-7 (δ<sub>H</sub> 2.85). The geometry of double bond was elucidated as Z configuration by the ROESY correlation of H-1' (δ<sub>H</sub> 7.00) and H-2" (δ<sub>H</sub> 7.96). The asparagine residue was assumed to be L since the condensation (C) domain in *xsze\_1979* was annotated as <sup>L</sup>C<sub>L</sub> and no epimerization (E) domain was present in the encoded NRPS.

Since **15** is produced by a BGC which resembles the first two modules of PAX peptide producing NRPS.<sup>[8]</sup> the configurations of the hydroxy group on the lipid chain and the Lys of **15a-c** were assumed to be consistent with PAX peptides as *R*-OH and *L*-Lys, respectively.

The configurations of amino acid residues in compounds **23-25**, **31a/b**, **32a/b**, and **33** were predicted based on a detailed analysis of the C, E and/or dual C/E domains occurring in the corresponding NRPSs<sup>[9]</sup> using antiSMASH.<sup>[10]</sup>

## 6. Bioactivity testing of extracts

### 6.1. Antimicrobial activity

For bioactivity testing against *Candida parapsilopsis*, *Magnaporthe grisea* and *Fusarium graminearum* the extracts were dried under the clean bench, followed by a chemical precipitation of the extracts with 70% EtOH and evaporation of the solvent to dryness under the clean bench. The precipitates were dissolved in water. Of these extracts 20 μL (1/10) were added to 180 μL minimal media<sup>[11]</sup> or potato-dextrose-broth (PDB (Carl Roth), containing pathogens (*Candida parapsilosis* OD<sub>600</sub> 0.1; 8 conidia/μL *Magnaporthe grisea*; 1 conidia/μL *Fusarium graminearum*). About every 12 hours the growth was measured with a plate reader (Multimode Reader Mithras<sup>2</sup> LB 943 - Berthold Technologies). For *Candida parapsilosis* the absorption at OD<sub>600</sub> was measured and for the other pathogens (*Magnaporthe grisea* and *Fusarium*

*graminearum*) the constitutive expressed **Green fluorescent protein** - GFP - signal (Absorption 460x10, Emission 520xm 10 UV) was used. Each pathogen was used in biological triplicates, while each measurement was performed in triplicates. As controls only 20 µL water instead of extracts.

For bioactivity testing against *Mrakia curviuscula* (Basidiomycota, Agaricomycotina, Tremellomycetes, Cryptobasidiales), *Pseudozyma prolifica* CBS 319.87 (Basidiomycota, Ustilaginomycotina, Ustilaginomycetes, Ustilaginales), *Globisporangium ultimum* Lev1805 (Oomycota, Peronosporomycotina, Peronosporomycetes, Pythiales), *Phytophthora palmivora* P16830 (Oomycota, Peronosporomycotina, Peronosporomycetes, Peronosporales), *Sapromyces elongatus* CBS 213.82 (Oomycota, Peronosporomycotina, Peronosporomycetes, Rhipidiales), *Fusarium rodolens* SBIKF 001.17 (Ascomycota, Pezizomycotina, Sordariomycetes, Hypocreales), and *Mortierella fluviatilis* SBIKF 002.17 (Zygomycota, Mucromycotina, Mortiellomycetes, Mortiellales), agar diffusion assays were performed using 30 µl of each extract dropped onto a sterile 9 mm assay disc and air dried at ambient temperature to constitute a test-disc. Isolates were first grown in a 60 mm Petri plate on Potato Dextrose Agar (PDA, Roth, Germany), and incubated at room temperature prior to the assay for 5 – 7 days.

For the assay, *Mr. curviuscula* and *Ps. prolifica* cell-suspension were done and adjusted to an absorbance of 0.1 at 600 nm (Implen Nanophotometer, Implen GmbH Munich, Germany). These cell-suspensions were spread onto a new 90 mm PDA plate using a Drigalski spatula, and test-discs were placed equidistantly onto the spread-plated PDA plates. For the mycelial cultures a 5 mm plug from the 5 – 7 day-old cultures of *G. ultimum*, *Ph. palmioviora*, *S. elongatus*, *F. rodolens*, and *Mo. fluviatilis* where placed in the centre of a new PDA plate and were allowed to grow for 2 – 3 days before placing the test discs equidistantly onto the test plates. Due to the difference in mycelial growth, inhibition zones were scored at different time-points after inoculation. The zone of inhibition (ZOI) as assessed from the rim of the test discs was measured after 24 h for *Ps. prolifica* and *G. ultimum*, after 36 h for *Mr. curviuscula* and *Mo. fluviatilis*, and 48 h for *F. rodolens*, *Ph. palmioviora*, and *S. elongatus* and scored in five different categories.

Chestnut blight *Cryphonectria parasitica* was isolated from infected sweet chestnut trees in Aydin province of Turkey. Fungus culture was provided by Aydin Adnan

Menderes University, Faculty of Agriculture, Department of Plant Protection and maintained on sabouraud dextrose agar (SDA) at 28 °C. Extracts were incorporated into SDA at 3% (v/v). The amount of prescribed distilled water was reduced by 3 % to allow for subsequent addition of treatment suspensions. When the media cooled to 45-50 °C, 3 % extract was added and mixed thoroughly before pouring in 35 mm petri dishes. A 5 mm diameter mycelia plug was cut from margin of actively growing a fungal culture and placed on the center surface of each agar dish containing 3 % metabolite [12]. Metabolite free SDA plates were used as negative control and *Xenorhabdus szentirmaii* cell-free supernatant was used as positive control with the same concentration of the metabolites. Plates were incubated at 28°C and colony diameter was measured after 7 days. The resulting vegetative growth was recorded by using a ruler to measure the diameter of the colony (cm); two perpendicular measurements were made on each plate [13] In vegetative growth assay, five replicate dishes were used for each treatment.

For antibiotic assays against *Rhizomucor miehei* (Tü 284; 37°C), *Eremothecium coryli* (ATCC 10647; 27°C), *Candida albicans* (ATCC 381; 37°C), *Enterobacter cloacae subsp. dissolvens* (LMG 2683; 27°C), and *Proteus vulgaris* (DSM 30119, 37°C), all fungi (except *E. lata*) were maintained on HA agar (per liter: 4 g glucose, 4 g yeast extract, 10 g malt extract, 2% agar; pH 5.5) and all bacteria on NB agar (per liter: 8 g Bacto-Nutrient broth, 1g NaCl, 2 % agar; pH 6.5). *E. lata* was cultured on BAF agar (per liter: 1 g yeast extract; 10 g glucose; 20 g maltose; 2 g peptone; 0.5 g KH<sub>2</sub>PO<sub>4</sub>; 0,4 g MgSO<sub>4</sub>·7H<sub>2</sub>O; 70 mg CaCl<sub>2</sub>·2H<sub>2</sub>O; 10 mg FeCl<sub>3</sub>·6H<sub>2</sub>O; 2 mg ZnSO<sub>4</sub>, 2% agar; pH 5.5). Test compounds were added to 96-well-plates and solvents were evaporated under sterile conditions. As negative control the corresponding solvent was used. For positive control ciclopirox (for fungi) and tetracycline or streptomycine (for bacteria) were used. Before testing filamentous fungi (*R. miehei*) were inoculated on agar plates for sporulation for 3-4 days. Spores were obtained by adding HA medium to the plates and dispensing of spores by scratching. At 1x10<sup>5</sup> spores/ml cultures were incubated at the appropriate temperature for 3 to 4 h at 120 rpm before 200 µl were added to the 96-well-plate with test compounds. Since the conidia of *E. lata* germinate poorly, 1 mg/ml wet weight of mycelium of a preculture (2 weeks old in BAF medium) was used for testing. One day before testing of *Er. coryli*, *C. albicans*, *En. cloacae* and *P. vulgaris*, fluid cultures were inoculated and cultivated at the appropriate temperature

at 120 rpm. Approximately 16 h after inoculation cells were counted and diluted to  $1 \times 10^5$  cells/ml in medium. 200  $\mu$ l of each suspension was added to the corresponding 96-well-plate with extracts. The inoculated 96-well-plates were incubated at the appropriate temperature for 16 to 24 h or for 48 h for *E. lata* at 120 rpm. Cell viability was assessed by eye. For *E. lata* ++ corresponds to 100% growth inhibition, + to 50-75%, and – to 0%. For *R. miehei*, *C. albicans*, *Er. coryli*, *En. cloaceae* and *P. vulgaris* + is equal to 75-100% growth inhibition, +/- to 50-75%, and – to 0%.

For the germination assays *Botrytis cinerea* (growth at room temperature), *Ph. aleophilum* (*Togninia minima*, CBS 100398, 27°C), and *Neonectria ditissima* were used. *B. cinerea* was maintained and grown on 2% malt agar (per liter: 20 g malt extract, 2% agar; pH 5.5) for 3 to 4 weeks. *Ph. aleophilum* and *N. ditissima* were maintained on YMG agar (per liter: 4 g/L yeast extract, 10 g/L malt extract, 10 g/L glucose; pH 6.5) for 3 to 6 weeks. Test compounds were added to 96-well-plates and solvents were evaporated under sterile conditions. As negative control the corresponding solvent was used. For positive control ciclopirox was used. Spores were obtained by adding sterile water to the plates and dispensing of spores by scratching for *B. cinerea* and *Ph. aleophilum*. This suspension was filtered through Miracloth and centrifuged (2700 g; 20°C; 10 min). Spore concentration was adjusted to  $2 \times 10^6$  spores/ml in sterile water for *B. cinerea* and *Ph. aleophilum*. Spores of *N. ditissima* were obtained by inoculating 1L flasks with one baffle filled with 500 ml AM medium (Apple agar (AM) was prepared by using two cored and shredded Breaburn apple which were autoclaved in 1 L deionized water, this mixture was subsequently filtered, 5 g of glucose were added to the flow through, the volume filled up to 1 L, and autoclaved again to give AM). Cultivation took 10-14 days at 22-25°C at 150 rpm until spores were seen. Spores were prepared by filtration through sterile Miracloth and centrifugation (2700 g; 20°C; 10 min). Spore concentration for *N. ditissima* was adjusted to  $3.5 \times 10^6$  spores/ml in sterile water. 2% malt medium or YMG medium was added to the 96-well-plate with test compounds for *B. cinerea*, or *Ph. aleophilum* and *N. ditissima*, respectively. Spore suspension was added to the test plates (final spore concentration:  $1 \times 10^5$  spores/ml for *B. cinerea*, or *Ph. aleophilum* and  $3.5 \times 10^6$  spores/ml for *N. ditissima*). The inoculated 96-well-plates were incubated at the appropriate temperature for 16 to 24 h or 48 h for *Ph. aleophilum* and *N. ditissima*. Viability and spore germination were evaluated by eye. For *B. cinerea* and *N. ditissima* +++

corresponds to 100% growth/germination inhibition, ++ to 75%, + to 50% and – to 0%. For *Ph. aleophilum* + is equal to 75-100% growth/germination inhibition, +/- to 50-75%, and – to 0%.

For bioactivity against *Staphylococcus aureus* ATCC 29213, *Enterococcus faecalis* ATCC 29212, *Escherichia coli* ATCC 25922, *Pseudomonas aeruginosa* ATCC 27853, *Micrococcus luteus* ATCC 9341 bacteria were suspended in sterile saline to the density of a McFarland 0.5 standard, corresponding to  $1-2 \times 10^8$  CFU/ml and the inoculum was spread on Mueller Hinton agar (Oxoid, Wesel, Germany) by a sterile cotton swab according to EUCAST guidelines<sup>[14]</sup>. Discs (Macherey-Nagel, Düren, Germany) with a diameter of 6 mm were loaded with 10  $\mu$ l of extracts and placed on the agar. After incubation at 36°C for 16-20h the zones of inhibition were determined.

For antibiotic activity against *Chromobacterium violaceum* and *Vibrio campbellii* strains were grown at 30° C in LB and LM medium, respectively. 20  $\mu$ l of the respective natural compound was pipetted into each well of a 96-microtiter plate. An overnight culture of the respective strain was diluted to an OD<sub>600</sub>= 0.2 and a volume of 150  $\mu$ l added to each well. OD was monitored every hour with a Sunrise plate reader (Tecan, Crailsheim).

## 6.2 Quorum-quenching activity assay

For testing on quorum quenching activity, we used *Chromobacterium violaceum* and *Vibrio campbellii* BB120 as reporter strains. At first, inhibition of quorum-sensing dependent violacein production of *C. violaceum* was measured. For that purpose, *C. violaceum* wild-type was grown at 30° C in LB medium [1% (w/v) NaCl; 1% (w/v) tryptone; 0.5% (w/v) yeast extract]. An overnight culture of *C. violaceum* with an OD<sub>600</sub>=2-3 was added to liquid hand-warm LB soft-agar 0.8% (w/v) in dilution of 1:100. Antimicrobial susceptibility disks with 20  $\mu$ l of the respective natural compound were dropped onto the solidified plates which were then incubated at 30°C overnight. On the next day the halo diameter around the antibiotic-testplate was measured.

As a second read-out to analyze AHL-degrading activity of the natural compounds produced by *Photorhabdus* and *Xenorhabdus* species quorum-sensing dependent bioluminescence of *V. campbellii* wild-type was used. Therefore, *V. campbellii* was grown at 30° C in LM medium [10% (w/v) peptone, 5% (w/v) yeast extract, 20% (w/v)

NaCl] supplemented with carbenicillin (100 µg/ml). An overnight culture of *V. campbellii* was inoculated at OD<sub>600</sub>=0.2 in LM and a volume of 150 µl was pipetted into each well of a 96-well microtiter plate. Cells were grown aerobically at 30° C for 2 hours and then a volume of 20 µl of the respective natural compound was added to each well. OD and luminescence were monitored every hour with a Sunrise plate reader (Tecan, Crailsheim) and a Centro luminometer (Berthold Technologies, Bad Wildbad), respectively.

### **6.3. Bioassays against higher eukaryotes**

#### **6.3.1. Zebrafish (*Danio rerio*)**

Wild type (Tü) zebrafish *Danio rerio* were maintained according to standard procedures and embryos were obtained by natural spawning (Westerfield, zebrafish book).

Procedures involving animals were conducted according to the guidelines of Goethe University in Frankfurt, Germany and approved by the German authorities (veterinary department of the Regional Board of Darmstadt).

Embryos were incubated in E3 (5.0 mM NaCl, 0.17mM KCl, 0.33mM CaCl<sub>2</sub>, 0.33mM MgSO<sub>4</sub>) at 28.5 °C at all times and placed in 24-well plates at a density of 20 embryos per well.

Diluted extracts were added at 2hours post-fertilization (hpf) and embryos were observed after 24h and 48h of treatment. Extracts were diluted 10 times in ddH<sub>2</sub>O except extracts 57-62, which were diluted 100 times in Methanol:Aceton 1:1. For this purpose 1 µL of extract was first diluted in 50µL of Aceton and 50µL of Methanol were then further added. All extracts were thoroughly vortexed before use. The Fibroblast Growth Factor Receptor (FGFR)-inhibitor SU5402 (20 µM in DMSO) was used as positive controls and ddH<sub>2</sub>O alone as negative controls. After 24h and 48h of treatments, the embryos were given a “toxicity score” between 1 and 5 based on the following criteria:

- 1: > 80% embryos normal or with only a slight developmental delay
- 2: > 80% embryos show strong developmental delay
- 3: > 80% embryos show strong malformation
- 4: > 80% embryos are dead
- 5: > 80% embryos fully degraded

### **6.3.2. *Caenorhabditis elegans***

Nematicidal activity was performed using L4-stage of *C. elegans* in 24-well microtiter plates [15], where cell-free supernatant of different bacterial strains was added for testing.

Culturing of *C. elegans* was performed under standard culturing conditions on nematode growth medium (NGM) agar plate [50mM NaCl, 0.25% (w/v) peptone, 1 mM CaCl<sub>2</sub>, 5 µg/ml cholesterol, 25mM KH<sub>2</sub>PO<sub>4</sub>, 1mM MgSO<sub>4</sub>, and 1.7%(w/v) agar]. Overnight culture of *E. coli* OP50 was seeded on NGM as a food source for nematode. The wild-type Bristol N2 strain of *C. elegans* was cultivated for three days at 25°C on the bacterial lawn. The plates were washed with Luria-Bertani (LB) liquid medium and filtered through sieve with pores of 40µm [16].

The bacteria to be tested were sub-cultured for two days at 30°C with 200 rpm shaking in LB liquid medium. The cell-free supernatants were prepared by centrifugation at 4000rpm for 30mn and filtered through 0.2µm filter.

In this assay, 80-100 L4-stage *C. elegans* were added in to a well of 24-well microtiter plate containing 300µl of cell-free supernatant of bacteria strains to be tested. These nematodes were incubated at 25°C and examined under dissecting microscope every 24h for three days. The cell-free supernatant of *E. coli* OP50 was used as a negative control. The killing assay was conducted in triplicates. The nematodes were classified as dead when no movement was observed under a dissecting microscope and when their bodies become straightened. Mortality of the nematodes was calculated as the ratio of dead nematodes over the total number of tested nematodes.

### **6.3.3. Mites (*Tetranychus urticae*)**

#### **Mass rearing of *Tetranychus urticae***

*T. urticae* was collected from strawberry fields in Aydin, Turkey and reared on bean plants in a room which had the same climate conditions where the host plant production was grown. Detached bean leaves (five or six) infested with different stages of *T. urticae* were transferred to the *T. urticae* rearing room. The rearing of *T. urticae* was performed continuously during the study using the method as described [17,18].

Bean plants (*Phaseolus vulgaris* cv. barbungia) were used for rearing and experiments of *T. urticae*. Plants were grown in climate-controlled room (25±2°C, 60±10% Rh, 16 h light) until the formation of first 5-6 leaves and then they were transferred to another room for the rearing of *T. urticae*.



### **Efficacy of bacterial metabolites against *T. urticae***

The efficacy of the extracts against *T. urticae* was assessed with Petri dish experiments. Moistened cotton was placed in each dish (9 cm diameter) and then a bean leaf was cut 6 cm diameter with scissor and placed bottom side facing up on the cotton. Twenty females obtained from the culture were transferred into each Petri dish with a fine hair brush (size 000). Different dilutions of extracts (50, 25, 12.5 %) were separately sprayed onto the leaf by a hand sprayer and a total volume of 0.3 ml of suspension was applied to each leaf surface. The number of living and dead individuals was recorded daily for four days. The same volume of sterile distilled water was sprayed on the leaf infested with mites as control. Four replicates were used for each treatment and the experiments were conducted three times on different dates. The extracts showing more than 50% mite mortality were selected for further dilution assessment. Otherwise, the metabolites causing less than 50% mortality were not tested at lower dilutions.

Data were analyzed using analysis of General Linear Model. Means were compared at the  $P=0.05$  level, and Tukey's test was used to separate means. Arcsine transformation was performed on mite mortality before statistical analyses (SPSS, 2011).

### **6.3.4. Aphids (*Myzus persicae*)**

Parthenogenetic clone of *Myzus persicae* was maintained on the turnip plant *Brassica rapa* L. subsp. (cv. Tonda A Colletto Viola) in a climate cabinet (KBWF 720, Binder GmbH, Tuttlingen, Germany) with a 16-h photoperiod, a day/night temperature of 24/18 °C and 60% relative humidity.

In this study, we tested the extracts for insecticidal activity against *M. persicae*. For each extract, a stock solution of 10-fold was prepared in acetone/methanol (1:1) and then working solutions were diluted with artificial AP3 diet (Febvay et al., 1988) for aphids. In order to investigate insecticidal potency of bacterial extracts against *M. persicae* we tested seven fourfold dilutions (4, 1, 0.250, 0.063, 0.016, 0.004, 0.001-fold) of each extract. Positive control was AP3 diet supplemented with the chemical insecticide imidacloprid (0.4 µg/mL) (Sigma-Aldrich, Taufkirchen, Germany), while mixture AP3 diet and acetone/methanol (1:1) was used as negative control. Imidacloprid is highly hydrophobic, and it was prepared first as a concentrated stock

(1000 µg/mL) in acetone and then working solution was diluted in the AP3 diet. Each treatment in this study was tested in three replicates.

A rapid aphid bioassays were carried out in 48-well plates covered with a thin layer of Parafilm M consisting of 48 sachets. Each well contained 10-15 aphids on a small excised leaf of *B. rapa*. Individuals of *M. persicae* could easily reach a sachet which contained 10 µL of AP3 diet supplemented with extract or controls, and feed by piercing Parafilm membrane. Bioassay plates were kept under controlled conditions, as described previously. Mortality was assessed after 3 days of aphid exposure to the test treatments in a way that mean value of survived aphids was counted from replicates of the negative control and mortality threshold was set to 70% in order to evaluate all other treatments. Bacterial extracts that showed mortality of 70% and higher in at least two replicates were considered as “active”, while those that had lower percent mortality were considered as “non-active” [19]. Survival of aphids was not affected in the negative control, while none of the aphids survived insecticide control treatment after 3 days of exposure (data not shown).

#### **6.4. Endothelial cells (EC)**

##### **Cell culture**

The human microvascular endothelial cell line CDC.EU.HMEC-1 was kindly provided by the Centers of Disease Control and Prevention (CDC, Atlanta, USA) [20]. HMEC-1 cells were cultivated on collagen G (Biochrom AG, Berlin, Germany) coated plastic ware in Endothelial Cell Growth Medium (ECGM, PELOBiotech) containing 10 % heat-inactivated fetal calf serum (FCS; Biochrom, Berlin, Germany), 100 U/ml penicillin (PAN-Biotech, Aidenbach, Germany), 100 µg/ml streptomycin (PAN-Biotech) and 0.25 µg/ml amphotericin B (PAN-Biotech). The human monocytic-like cell line THP-1 was originally established from the peripheral blood of a one-year-old boy suffering from acute monocytic leukemia (AML). THP-1 cells were cultured in RPMI-1640 medium (RPMI, PAN-Biotech) containing 10 % heat-inactivated FCS, 100 U/ml penicillin and 100 µg/ml streptomycin [PMID: 6970727]. Both cell lines were incubated at 37 °C in an atmosphere of 5% CO<sub>2</sub> and 95% air. HMEC-1 cells were used for experiments up to passage 20 and THP-1 cells up to passage 30 without altering their cell-type specific morphology and functional characteristics.

### **Cell viability assay**

The effect of aqueous extracts on the metabolic activity of HMEC-1 were analyzed using a CellTiter-Blue cell viability assay (Promega GmbH, Mannheim, Germany). In brief, HMEC-1 cells were grown to confluence in 96-well plates and treated with the indicated extracts or vehicle control (1:100 dilution) for 24 h. The resazurin containing CellTiter-Blue reagent was added to the cells in a ratio of 1:10 for the last 4 h of treatment. Since viable cells are able to reduce resazurin into fluorescent resorufin, the metabolic activity was determined by fluorescence measurements (ex: 579 nm, em: 584 nm) using a microplate reader (Tecan Infinite F200 Pro, Tecan, Männedorf, Switzerland).

### **Determination of cell number**

To investigate possible cytotoxic effects of the aqueous extracts on HMEC-1 cells, the number of cells was determined using crystal violet solution: HMEC-1 cells were grown to confluence in 96-well plates and treated with the indicated extracts or vehicle control (1:100 dilution) for 24 h or pre-treated with the indicated extracts or vehicle control for 30 min and activated with TNF $\alpha$  (10 ng/ml) for 24 h. Afterwards, cells were washed once with PBS containing Ca<sup>2+</sup> and Mg<sup>2+</sup> and fixed with a methanol-ethanol (ratio 2:1) solution for 10 min before staining with crystal violet solution (0.5 % in 20 % methanol, Sigma-Aldrich, Taufkirchen, Germany) for 15 min. After removing the unbound residual crystal violet solution with tap water, the cells were dried for at least 24 h. Crystal violet bound to DNA was resolved in 20 % acetic acid and absorption was measured at 590 nm using a microplate reader (Tecan).

### **Proliferation assay**

The impact of the aqueous extracts on the proliferation of HMEC-1 cells was investigated by measuring the cell number after staining cells with crystal violet. In brief, 2 x 10<sup>3</sup> cells per well were seeded in 96-well plates. After 24 h the cells were treated with the indicated extracts or vehicle control in a dilution range starting from 1:10 and 1:100, continuing with a 1:1 dilution until the extracts ceased to affect cell viability or proliferation. After 72 h the number of cells was determined using crystal violet solution as described above, whereby the untreated control cells were fixed and stained directly 24 h after seeding. To determine effects of the extracts on the relative proliferation rate of HMEC-1 cells, the obtained data from untreated control cells (fixed

and stained after 24 h) were subtracted from values obtained from stimuli treated cells (fixed and stained after 72 h).

### **Cell adhesion assay**

To analyze the influence of the aqueous extracts on the adhesion of the human monocytic-like cell line THP-1 onto HMEC-1 cells, cell adhesion assays were performed, in which untreated THP-1 cells were allowed to adhere to HMEC-1 cells treated with aqueous extracts: HMEC-1 cells were grown to confluence in 96-well plates and pre-treated with the indicated extracts or vehicle control (1:100 dilution) for 30 min and activated with TNF $\alpha$  (10 ng/ml) for 24 h. THP-1 cells were stained in serum-free RPMI with CellTracker Green (5  $\mu$ M, Thermo Fisher Scientific, Waltham, MA, USA) for 30 min at 37 °C in a water bath. Afterwards, THP-1 cells were washed once with serum-free RPMI before the cell concentration was adjusted with serum-containing RPMI to 2 x 10<sup>5</sup> cells per ml. The culture medium was removed from the treated HMEC-1 cells and THP-1 cells (2 x 10<sup>4</sup> cells per well) were allowed to adhere for 5 min. Non-adherent cells were removed by washing with PBS containing Ca<sup>2+</sup> and Mg<sup>2+</sup> and the adhesion was quantified by fluorescence measurements (ex: 485 nm, em: 535 nm) using a microplate reader (Tecan). The measured adhesion levels were normalized to the number of HMEC-1 cells that were present after treatment with aqueous extracts, which was determined using crystal violet solution as described above.

## **6.5. In vitro assays**

### **Cells and reagents**

HCT116 cells were cultured in McCoy's 5A (Modified) medium supplemented with 10 % FBS and 1 % Pen/Strep. RAW264.7 macrophages were cultured in RPMI1640 medium supplemented with 10 % FBS and 1 % P/S. Lyophilized extracts were reconstituted with water to a 10x concentration. This stock solution was used to dilute the extracts to a final dilution of 1:10 in the respective media.

### **Apoptosis assay**

20,000 HCT 116 cells were seeded in a black poly-D-lysine-coated 96-well plate and incubated for 24 h at 37 °C. The culture medium was replaced by 100  $\mu$ l DMEM medium without phenol red (Gibco, 21063-029) supplemented with 10 % FBS and 1

% Pen/Strep and containing extracts diluted 1:10 or 100  $\mu$ M celecoxib as positive control (data not shown). Cells were incubated for 24 h at 37 °C with 5% CO<sub>2</sub>. One  $\mu$ l of CellEvent Caspase-3/7 Green Detection Reagent (1:10 diluted in DMEM-medium without phenol red) was added and incubated for 90 min at 37 °C (without CO<sub>2</sub>). Afterwards, 1  $\mu$ l of DRAQ5 (1:25 diluted in DMEM-medium without phenol red) was added and the cells were incubated for 30 min at RT. Images were acquired using the ImageXpress Micro Confocal High Content Imaging System (Molecular Device, San Jose, USA). The percentage of dead cells was determined using the “live/dead”-analysis tool from Molecular Device by calculating the ratio of apoptotic cells (Caspase-3/7 positive cells) to all cells (DRAQ5 positive cells). Four different measuring sites in the well were analyzed and the average value was used for data presentation. The amount of apoptotic cells was related to all cells to determine the apoptotic rate. To simplify the presentation of data the apoptotic rate were clustered in 10 groups. An apoptotic rate from 0-10 % was classified as 1, from 11-20 % as 2 and so on.

### **Cell cycle assay**

20,000 HCT116 in 100  $\mu$ l medium were seeded in a 96-well cell culture plate and incubated for 24 h at 37 °C. The culture medium was replaced by 100  $\mu$ l medium containing extract diluted 1:10 or control substances. As negative control medium with 10% FBS was used. G1-block was induced by medium without 10 % FBS. 20  $\mu$ M curcumin and 0.2  $\mu$ M staurosporine were used to induce G2- and S-block, respectively (data not shown). After an incubation step of 24 h at 37 °C, cells were harvested, suspended in 200  $\mu$ l sample buffer (1 g glucose/l PBS without calcium or magnesium), mixed, centrifuged (200 g, 4 min, 4 °C) and supernatant was discarded. This step was repeated once. The supernatant, apart from 10  $\mu$ l was removed. The cell pellets were vigorously vortexed in the remaining buffer for 10 s (~750 rpm). With continuous shaking (~500 rpm), 150  $\mu$ l of ice-cold 70 % ethanol were added drop by drop to the pellet. For maximum resolution of cellular DNA, the samples were allowed to fix in ethanol overnight (> 18h) at 4 °C. Samples were vortexed, suspended in 100  $\mu$ l sample buffer, centrifuged (500 g; 10 min; 4 °C) and supernatants were removed. Cell pellets were resuspended and incubated for 40 min at room temperature with 100  $\mu$ l staining buffer (20  $\mu$ l/ml propidium iodide and 0.2 mg/ml RNase in sample buffer). Samples were vortexed and measured within 24 hours in a MACSQuant Analyzer (Miltenyi

Biotec GmbH, Bergisch Gladbach, Germany). Cell cycle distribution was determined using FlowJo software.

### **NO- and PGE<sub>2</sub> determination**

20,000 RAW264.7 macrophages in 100 µl medium were seeded in a 96-well cell culture plate and incubated for 24 h at 37 °C. To test if the extracts induce NO and/or PGE<sub>2</sub> release the different extracts (diluted 1:10) were added. As positive control 100 ng/ml lipopolysaccharide (LPS) was used. To test if the extracts inhibit NO and/or PGE<sub>2</sub> release the cells were pre-incubated with extracts for 1 h before LPS were added for the stimulation of NO and PGE<sub>2</sub> synthesis. After an incubation step of 24 h at 37 °C supernatants were collected and stored at -80°C. The PGE<sub>2</sub> concentration was determined using a PGE<sub>2</sub> ELISA (Enzo Life Sciences GmbH, Lörrach, Germany). The ELISA was achieved as recommended by the supplier. The NO concentration was determined using the NO assay developed by Griess<sup>[21]</sup>. Briefly, 80 µl cell supernatant or standard sample were added in a 96 well microplate and thereafter, 20 µl sulfanilamide solution (120 mg sulfanilamide in 30 ml 1N hydrochloric acid) und 20 µl naphthylendiamine solution (180 mg N-(naphthyl) ethylendiamine dihydrochloride in 30 ml water) were added. After an incubation step of 15 minutes at room temperature the absorbance at 540 nm was detected using the EnSpire® Multimode Plate Reader (Perkin Elmer, Hamburg, Germany). For NO/PGE<sub>2</sub> induction/inhibition results the released amount of NO/PGE<sub>2</sub> from samples was related to the LPS-value. Since all supernatants might contain at least traces of LPS only a clear reduction of NO level is obvious for some extracts. To simplify presentation of data the induction/inhibition rates were clustered in 10 groups. A rate of 0-10% was classified as 1, of 11-20 % as 2 and so on.

## B. Supplementary Tables

**Supplementary Table 1.** NPs mentioned in this work. Structures are shown in Supplementary Fig.2. Double charged MS signals are marked (\*).

| Name                     | Compound   | Detected $m/z$<br>[M+H] <sup>+</sup> | Reference |
|--------------------------|------------|--------------------------------------|-----------|
| Anthraquinone (AQ-270b)  | <b>1</b>   | 271.1                                | [22]      |
| Isopropylstilbene (IPS)  | <b>2</b>   | 255.1                                | [23,24]   |
| Phurealipid-229 (PL-229) | <b>3</b>   | 229.3                                | [25]      |
| GameXPepptide A (GXPA)   | <b>4a</b>  | 586.4                                | [26,27]   |
| GameXPepptide C          | <b>4b</b>  | 552.4                                |           |
| Photopyrone D (PPYD)     | <b>5</b>   | 295.2                                | [28]      |
| Glidobactin A            | <b>6</b>   | 521.3                                | [29,30]   |
| Ririwpeptide A           | <b>7</b>   | 372.2*                               | [31]      |
| Rhabdopeptide (RXP-645)  | <b>8a</b>  | 645.4                                | [32,33]   |
| Rhabdopeptide (RXP-659)  | <b>8b</b>  | 659.4                                |           |
| Rhabdopeptide (RXP-758)  | <b>8c</b>  | 758.4                                |           |
| Rhabdopeptide (RXP-772)  | <b>8d</b>  | 772.4                                |           |
| Rhabdopeptide (RXP-885)  | <b>8e</b>  | 885.5                                |           |
| Rhabdopeptide (RXP-574)  | <b>8f</b>  | 574.4                                |           |
| Rhabdopeptide (RXP-687)  | <b>8g</b>  | 687.4                                |           |
| Xenofuranone B           | <b>9</b>   | 281.3                                | [34]      |
| Pyrrolizixenamide        | <b>10</b>  | 251.1                                | [35]      |
| Xenobactin               | <b>11</b>  | 756.4                                | [36]      |
| Xenoamicin-650           | <b>12a</b> | 650.8*                               | [37]      |
| Xenoamicin-657           | <b>12b</b> | 657.8*                               |           |
| Xenoamicin-643           | <b>12c</b> | 643.8*                               |           |
| Xenoamicin-630           | <b>12d</b> | 630.4*                               |           |
| Xenoamicin-637           | <b>12e</b> | 637.4*                               |           |
| Xenoamicin-644           | <b>12f</b> | 644.4*                               |           |
| Xenoamicin-651           | <b>12g</b> | 651.4*                               |           |
| Szentiamide              | <b>13</b>  | 838.4                                | [38,39]   |
| Szentirazine             | <b>14</b>  | 340.2                                | this work |
| PAX-short                | <b>15a</b> | 428.3                                | this work |
| PAX-short                | <b>15b</b> | 430.3                                |           |
| PAX-short                | <b>15c</b> | 456.3                                |           |

|                                |            |        |           |
|--------------------------------|------------|--------|-----------|
| Xenocoumacin 1 (XCN1)          | <b>16a</b> | 466.2  | [40,41]   |
| Xenocoumacin 2 (XCN2)          | <b>16b</b> | 407.2  |           |
| Phenylethylamide-240 (PEA-240) | <b>17a</b> | 240.3  | [42]      |
| PEA-248                        | <b>17b</b> | 248.3  |           |
| Xenorhabdin-299 (XRD-299)      | <b>18a</b> | 299.1  | [4,43]    |
| XRD-315                        | <b>18b</b> | 315.1  |           |
| Xenortide A                    | <b>19</b>  | 410.2  | [44]      |
| Nematophin                     | <b>20</b>  | 273.1  | [45]      |
| Xenotrapeptide                 | <b>21</b>  | 411.2  | [46]      |
| Kolossin B                     | <b>22</b>  | 843.6* | [47]      |
| Silalthride                    | <b>23</b>  | 546.8* | this work |
| Flesusid A                     | <b>24a</b> | 627.8* | this work |
| Flesusid B                     | <b>24b</b> | 620.4* | this work |
| Cuidadopeptide                 | <b>25</b>  | 625.4* | this work |
| Rhabduscin                     | <b>26</b>  | 333.3  | [48]      |
| Fabclavine IIa                 | <b>27</b>  | 1312.9 | [49]      |
| PAX-peptide                    | <b>28</b>  | 1050.8 | [8]       |
| Pyreudione A                   | <b>29a</b> | 266.1  | [50]      |
| Pyreudione B                   | <b>29b</b> | 294.1  |           |
| Labradorin A                   | <b>30a</b> | 241.1  | [51,52]   |
| Labradorin B                   | <b>30b</b> | 255.1  |           |
| Entolysin (Etl-870)            | <b>31a</b> | 870.0* | [53]      |
| Entolysin (Etl-861)            | <b>31b</b> | 861.0* |           |
| Entolysin-431                  | <b>32a</b> | 431.5  | this work |
| Entolysin-302                  | <b>32b</b> | 302.2  | this work |
| Pseudotetratide A              | <b>33</b>  | 528.2  | this work |



**Supplementary Table 2.**  $^1\text{H}$  (500 MHz) and  $^{13}\text{C}$  (125 MHz) NMR spectroscopic data for szentirazine (**14**) in DMSO- $d_6$  ( $\delta$  in ppm and  $J$  in Hz).

| no.      | <b>14</b>                      |                     |
|----------|--------------------------------|---------------------|
|          | $\delta_{\text{H}}$ (mult., J) | $\delta_{\text{C}}$ |
| 1 (NH)   | 8.22 (s)                       |                     |
| 2        |                                | 161.1               |
| 3        |                                | 123.1               |
| 4 (NH)   |                                |                     |
| 5        |                                | 166.5               |
| 6        | 4.44 (dt, 5.1, 2.5)            | 51.6                |
| 7        | 2.85 (brs)                     | 38.9                |
| 8        |                                | 171.8               |
| 9 (NH)   |                                |                     |
| 10       |                                | 165.4               |
| 11 (NH)  | 8.38 (s)                       |                     |
| 1'       | 7.00 (s)                       | 107.8               |
| 1'' (NH) | 11.66 (s)                      |                     |
| 2''      | 7.96 (d, 2.6)                  | 126.8               |
| 3''      | -                              | 108.4               |
| 3''a     |                                | 127.5               |
| 4''      | 7.65 (d, 7.9)                  | 118.7               |
| 5''      | 7.11 (m)                       | 120.4               |
| 6''      | 7.18 (m)                       | 122.6               |
| 7''      | 7.43 (d, 8.0)                  | 112.5               |
| 7''a     |                                | 136.1               |

**Supplementary Table 3.** MS data for all new NPs shown in Fig. 2d.

| NP         | m/z detected                    |                                 |                                 | Sum formula                                                                                     |
|------------|---------------------------------|---------------------------------|---------------------------------|-------------------------------------------------------------------------------------------------|
|            | <sup>12</sup> C <sup>14</sup> N | <sup>12</sup> C <sup>15</sup> N | <sup>13</sup> C <sup>14</sup> N |                                                                                                 |
| <b>14</b>  | 340.1056                        |                                 |                                 | C <sub>16</sub> H <sub>14</sub> N <sub>5</sub> O <sub>4</sub> [M-H] <sup>-</sup>                |
| <b>15a</b> | 428.3130                        | 431.3 (N <sub>3</sub> )         |                                 | C <sub>22</sub> H <sub>42</sub> N <sub>3</sub> O <sub>5</sub> [M+H] <sup>+</sup>                |
| <b>15b</b> | 430.3282                        | 433.3 (N <sub>3</sub> )         |                                 | C <sub>22</sub> H <sub>44</sub> N <sub>3</sub> O <sub>5</sub> [M+H] <sup>+</sup>                |
| <b>15c</b> | 456.3442                        | 459.3 (N <sub>3</sub> )         |                                 | C <sub>24</sub> H <sub>46</sub> N <sub>3</sub> O <sub>5</sub> [M+H] <sup>+</sup>                |
| <b>23</b>  | 546.8368                        | 552.3209 (N <sub>11</sub> )     | 572.9245 (C <sub>52</sub> )     | C <sub>52</sub> H <sub>90</sub> N <sub>11</sub> O <sub>14</sub> [M+H] <sup>+</sup>              |
| <b>24a</b> | 627.8477                        |                                 | 653.9358 (C <sub>52</sub> )     | C <sub>52</sub> H <sub>91</sub> N <sub>19</sub> O <sub>17</sub> [M+H] <sup>+</sup>              |
| <b>24b</b> | 620.3609                        |                                 | 646.9504 (C <sub>52</sub> )     | C <sub>53</sub> H <sub>94</sub> N <sub>18</sub> O <sub>16</sub> [M+H] <sup>+</sup>              |
| <b>25</b>  | 625.3992                        | 631.3836 (N <sub>12</sub> )     | 657.5065 (C <sub>64</sub> )     | C <sub>64</sub> H <sub>106</sub> N <sub>12</sub> O <sub>13</sub> [M+H] <sup>+</sup>             |
| <b>32a</b> | 431.2745                        |                                 |                                 | C <sub>21</sub> H <sub>39</sub> N <sub>2</sub> O <sub>7</sub> [M+H] <sup>+</sup>                |
| <b>32b</b> | 302.2321                        |                                 |                                 | C <sub>16</sub> H <sub>32</sub> NO <sub>4</sub> [M+H] <sup>+</sup>                              |
| <b>33</b>  | 528.2012                        | 535.1808 (N <sub>7</sub> )      | 549.2714 (C <sub>21</sub> )     | C <sub>21</sub> H <sub>34</sub> N <sub>7</sub> O <sub>5</sub> S <sub>2</sub> [M+H] <sup>+</sup> |

**Supplementary Table 4.**  $^1\text{H}$  (500 MHz) and  $^{13}\text{C}$  (125 MHz) NMR spectroscopic data for pseudotetratide (**33**) in DMSO- $d_6$  ( $\delta$  in ppm and  $J$  in Hz).

| no. | <b>33</b>                      |                     |
|-----|--------------------------------|---------------------|
|     | $\delta_{\text{H}}$ (mult., J) | $\delta_{\text{C}}$ |
| 1   | 1.82 (s)                       | 22.8                |
| 2   |                                | 169.7               |
| 3   | 8.15 (d, 8.32)                 |                     |
| 4   | 4.55 (m)                       | 50.9                |
| 5   | 1.90 (overlap)                 | 28.9                |
|     | 1.49 (m)                       |                     |
| 6   | 1.55 (m)                       | 26.0                |
|     | 1.42 (m)                       |                     |
| 7   | 3.12 (m)                       | 41.2                |
| 9   |                                | 157.6               |
| 10  |                                | 170.2               |
| 12  | 5.31 (dd, 7.9, 3.6)            | 58.3                |
| 13  | 2.29 (m)                       | 33.3                |
|     | 1.90 (m)                       |                     |
| 14  | 1.98 (overlap)                 | 24.3                |
| 15  | 3.77 (m)                       | 47.2                |
| 16  |                                | 172.4               |
| 18  | 8.11 (s)                       | 123.4               |
| 19  |                                | 149.4               |
| 21  |                                | 160.0               |
| 22  | 8.40 (d, 6.4)                  |                     |
| 23  | 4.05 (m)                       | 24.3                |
| 24  | 1.98 (m)                       | 33.3                |
| 25  | 2.45 (m)                       | 30.4                |
| 27  | 2.02 (s)                       | 15.1                |
| 28  |                                | 175.2               |

**Supplementary Table 5.** Assays and organisms used for bioactivity testing of culture supernatants.

| <b>Assay</b>                   | <b>Organism/assay</b>                     |                                |
|--------------------------------|-------------------------------------------|--------------------------------|
| Gram-negative                  | <i>Escherichia coli</i> ATCC 29522        |                                |
|                                | <i>Pseudomonas aeruginosa</i> ATCC 27853  |                                |
|                                | <i>Proteus vulgaris</i>                   |                                |
|                                | <i>Enterobacter dissolvens</i>            |                                |
|                                | <i>Vibrio campbelli</i>                   |                                |
| Gram-positive                  | <i>Staphylococcus aureus</i> ATCC 29213   |                                |
|                                | <i>Micrococcus luteus</i> ATCC 9341       |                                |
|                                | <i>Enterococcus faecalis</i> ATCC 29212   |                                |
| Quorum quenching               | <i>Vibrio campbellii</i>                  |                                |
|                                | <i>Chromobacterium violaceum</i>          |                                |
| Fungi                          | <i>Candida albicans</i>                   |                                |
|                                | <i>Candida parapsilosis</i>               |                                |
|                                | <i>Magnaporthe grisea</i>                 |                                |
|                                | <i>Fusarium graminearum</i>               |                                |
|                                | <i>Botrytis cinerea</i>                   |                                |
|                                | <i>Phaeoacremonium aleophilum</i>         |                                |
|                                | <i>Mucor mihei</i>                        |                                |
|                                | <i>Neonectria ditissima</i>               |                                |
|                                | <i>Nematospora coryii</i>                 |                                |
|                                | <i>Mrakia curviuscula</i>                 |                                |
|                                | <i>Pseudozyma prolifica</i>               |                                |
|                                | <i>Fusarium rodolens</i>                  |                                |
|                                | <i>Mortierelia fluviatilis</i>            |                                |
|                                | <i>Cryphonectria parasitica</i>           |                                |
|                                | Oomycetes                                 | <i>Phytophthora palmivora</i>  |
|                                |                                           | <i>Globisporangium ultimum</i> |
|                                |                                           | <i>Sapromyces elongatus</i>    |
| Higher eukaryotes              | <i>Danio rerio</i> (zebrafish)            |                                |
|                                | <i>Caenorhabditis elegans</i> (nematode)  |                                |
|                                | <i>Tetranychus urticae</i> (mite)         |                                |
|                                | <i>Myzus persicae</i> (aphid)             |                                |
| <i>In vitro</i> assays         | Endothelial cell (EC) metabolic activity  |                                |
|                                | EC cytotoxicity                           |                                |
|                                | EC proliferation                          |                                |
|                                | Leucocyte adhesion to EC                  |                                |
|                                | Apoptosis against HCT116 cells            |                                |
|                                | Induction of NO                           |                                |
|                                | Induction of Prostaglandin E <sub>2</sub> |                                |
| Cell cycle analysis (G2-block) |                                           |                                |

**Supplementary Table 6.** Wild type strains used in this work.

| Strain                                 | Genotype                                                                   | Reference  |
|----------------------------------------|----------------------------------------------------------------------------|------------|
| <i>E. coli</i> S17-1 $\lambda$ pir     | Tpr Smr recA thi rsdRM+ RP4::2-Tc::Mu::KM Tn7, $\lambda$ pir phage lysogen | Invitrogen |
| <i>Photorhabdus laumondii</i> TT01     | wild type                                                                  | [54]       |
| <i>Photorhabdus</i> PB45.5             | wild type                                                                  | [55]       |
| <i>Xenorhabdus doucetiae</i> DSM17909  | wild type                                                                  | [56]       |
| <i>Xenorhabdus nematophila</i> HGB081  | wild type                                                                  | [57]       |
| <i>Xenorhabdus szentirmai</i> DSM16338 | wild type                                                                  | [58]       |
| <i>Pseudomonas entomophila</i>         | wild type                                                                  | [59]       |

**Supplementary Table 7.** List of  $\Delta hfq$  mutants, promoter exchange mutants and primers and plasmids used for their construction.

See separate Excel file.

**Supplementary Table 8.** List of general plasmids used in this work.

| Plasmid             | Genotype                                                                             | Reference |
|---------------------|--------------------------------------------------------------------------------------|-----------|
| pCEP <sub>kan</sub> | pDS132 based, R6K ori, oriT, kan <sup>R</sup> , <i>araC</i> , <i>P<sub>BAD</sub></i> | [4]       |
| pCEP                | pDS132 based, R6K ori, oriT, cm <sup>R</sup> , <i>araC</i> , <i>P<sub>BAD</sub></i>  | [4]       |
| pCK <sub>cipB</sub> | pDS132 based, R6K ori, oriT, cm <sup>R</sup> , <i>cipB</i> , <i>sacB</i>             | [27]      |
| pEB17               | pDS132 based, R6K ori, oriT, kan <sup>R</sup> , <i>cipB</i> , <i>sacB</i>            | [42]      |

**Supplementary Table 9.** List of general primers used in this work.

| Oligonucleotide | Sequence (5'-3')              |
|-----------------|-------------------------------|
| VpDS132-fw      | GATCGATCCTCTAGAGTCGACCT       |
| VpDS132-rv      | ACATGTGGAATTGTGAGCGG          |
| VpCEP-fw        | GCTATGCCATAGCATT TTTATCCATAAG |
| pCEP-BB-fw-gjb  | ATGTGCATGCTCGAGCTC            |
| pCEP-BB-rv-gjb  | ATGCTAGCCTCCTGTTAGC           |

## C. Supplementary Figures

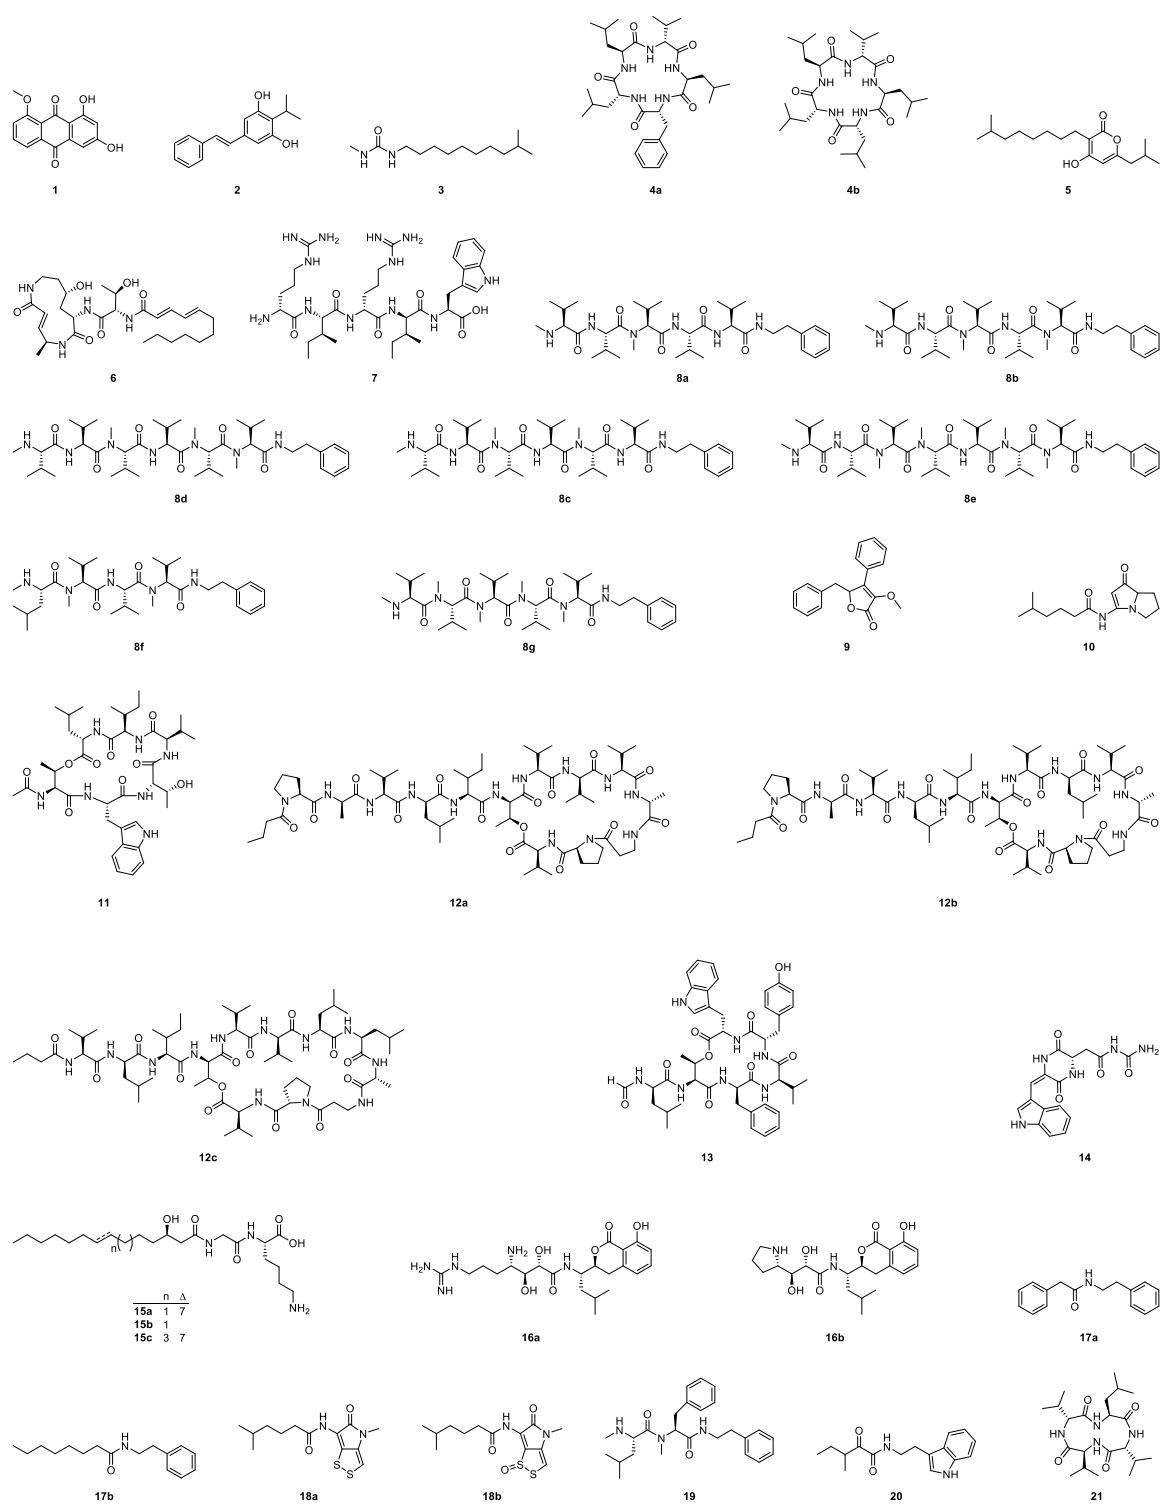

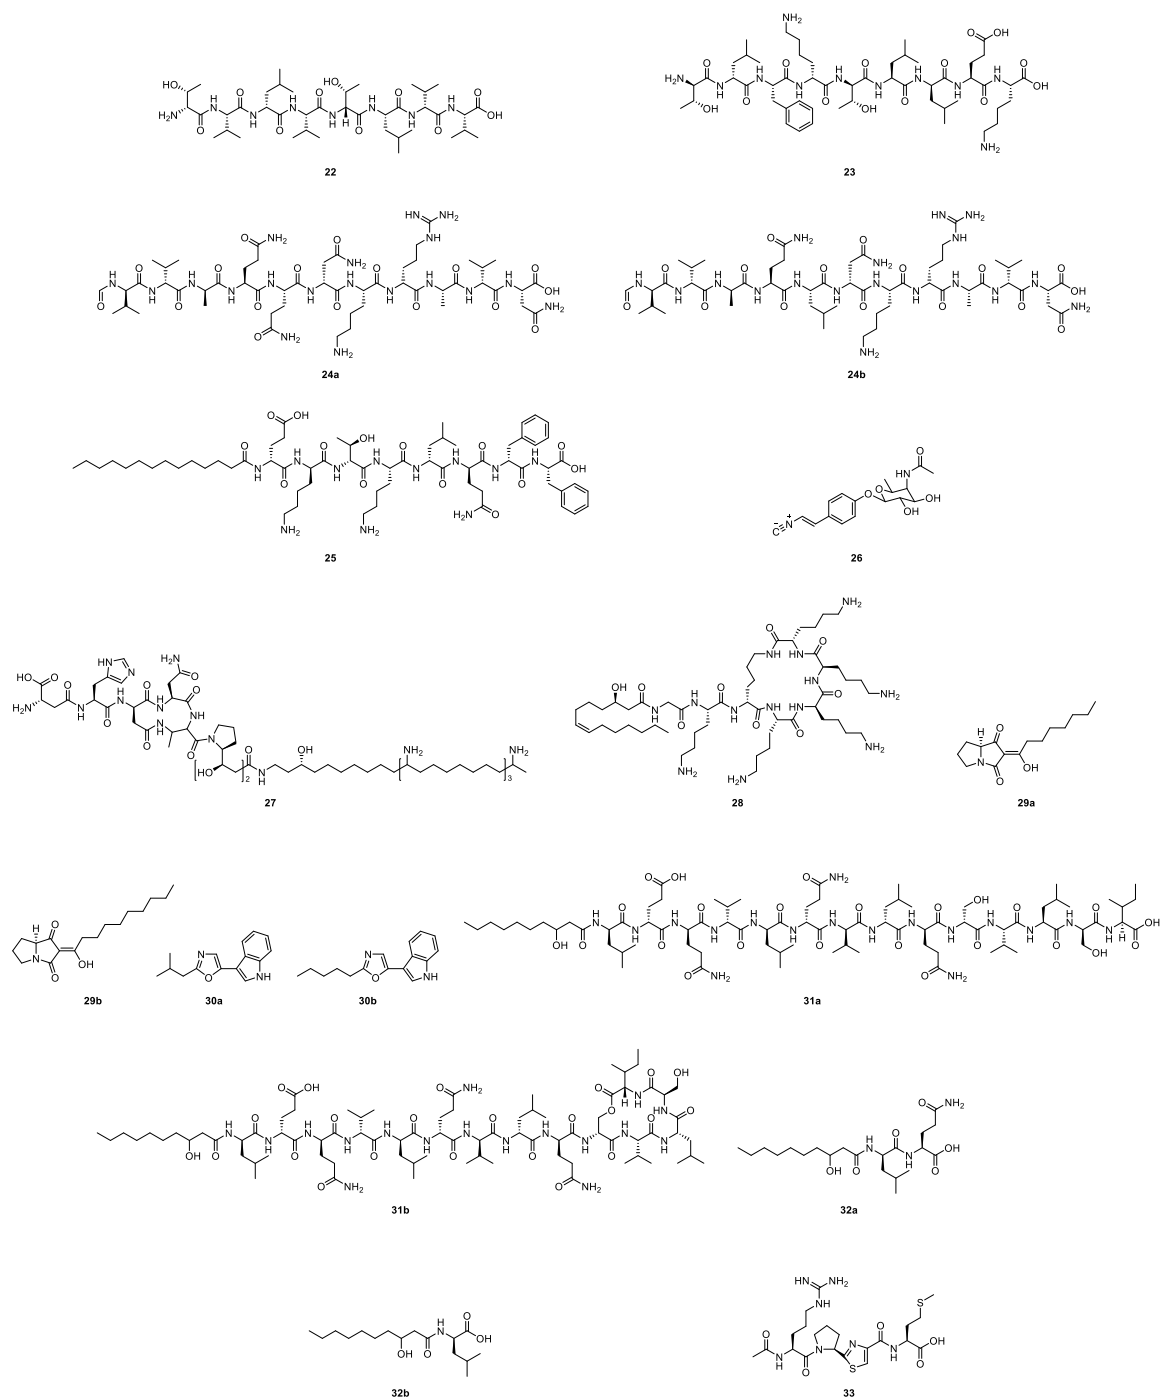

**Supplementary Fig. 1.** Structures of all NPs involved in the study.

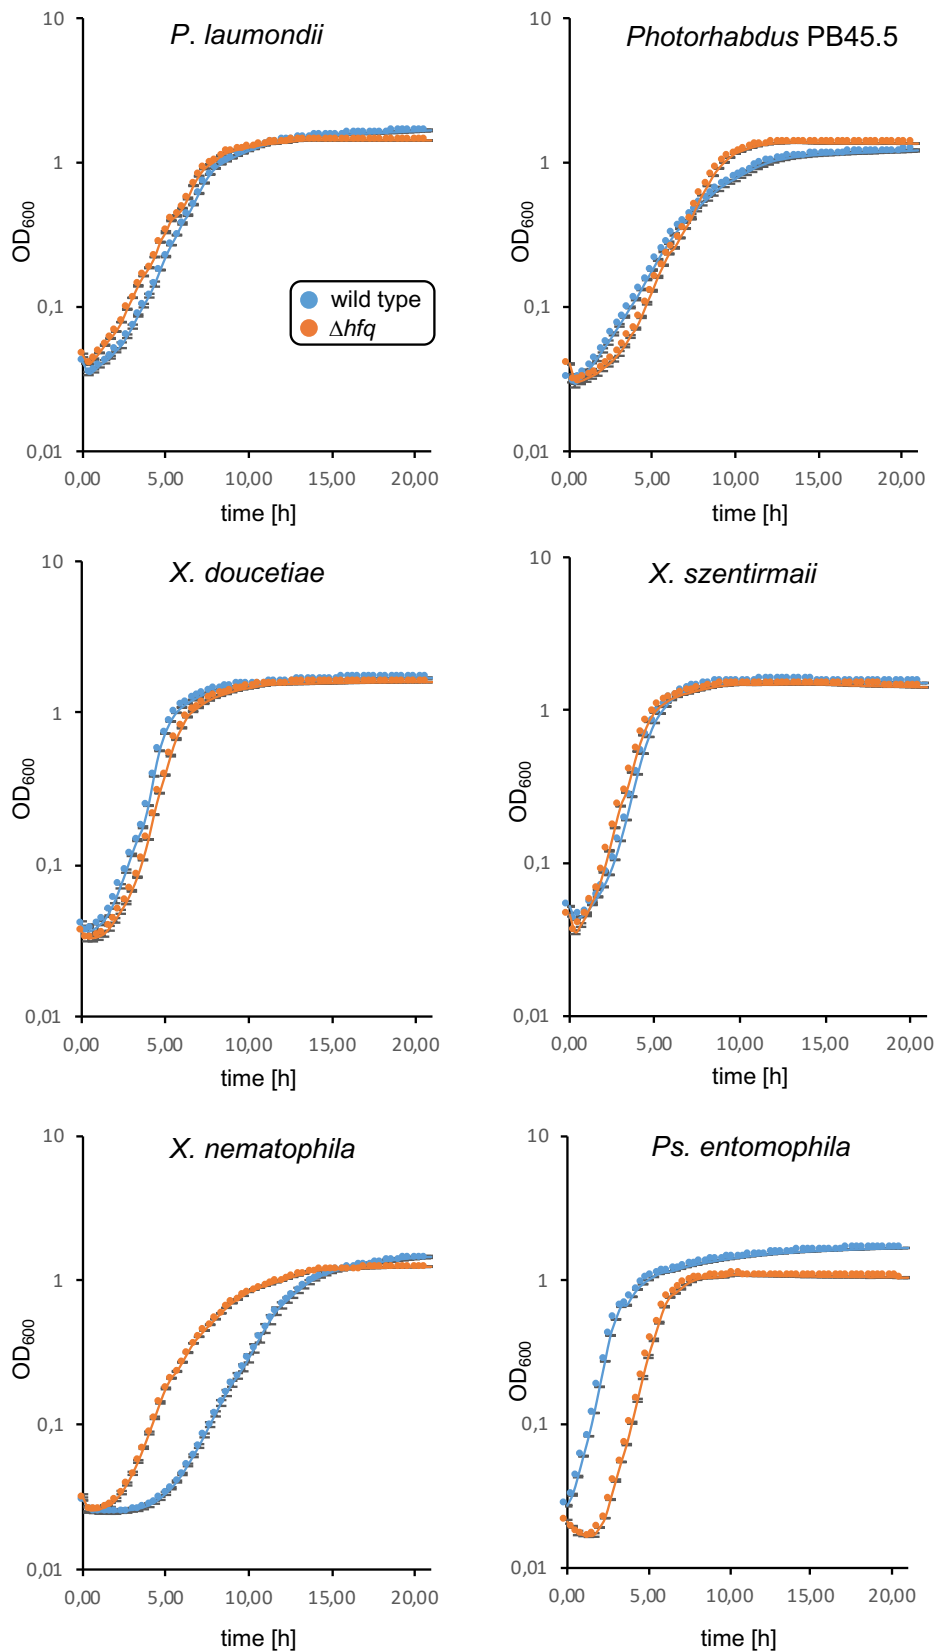

**Supplementary Fig. 2.** Comparison of growth of wild type (blue) and  $\Delta hfg$  mutants (orange) used in this work. Data from triplicate experiments including standard deviations is shown.



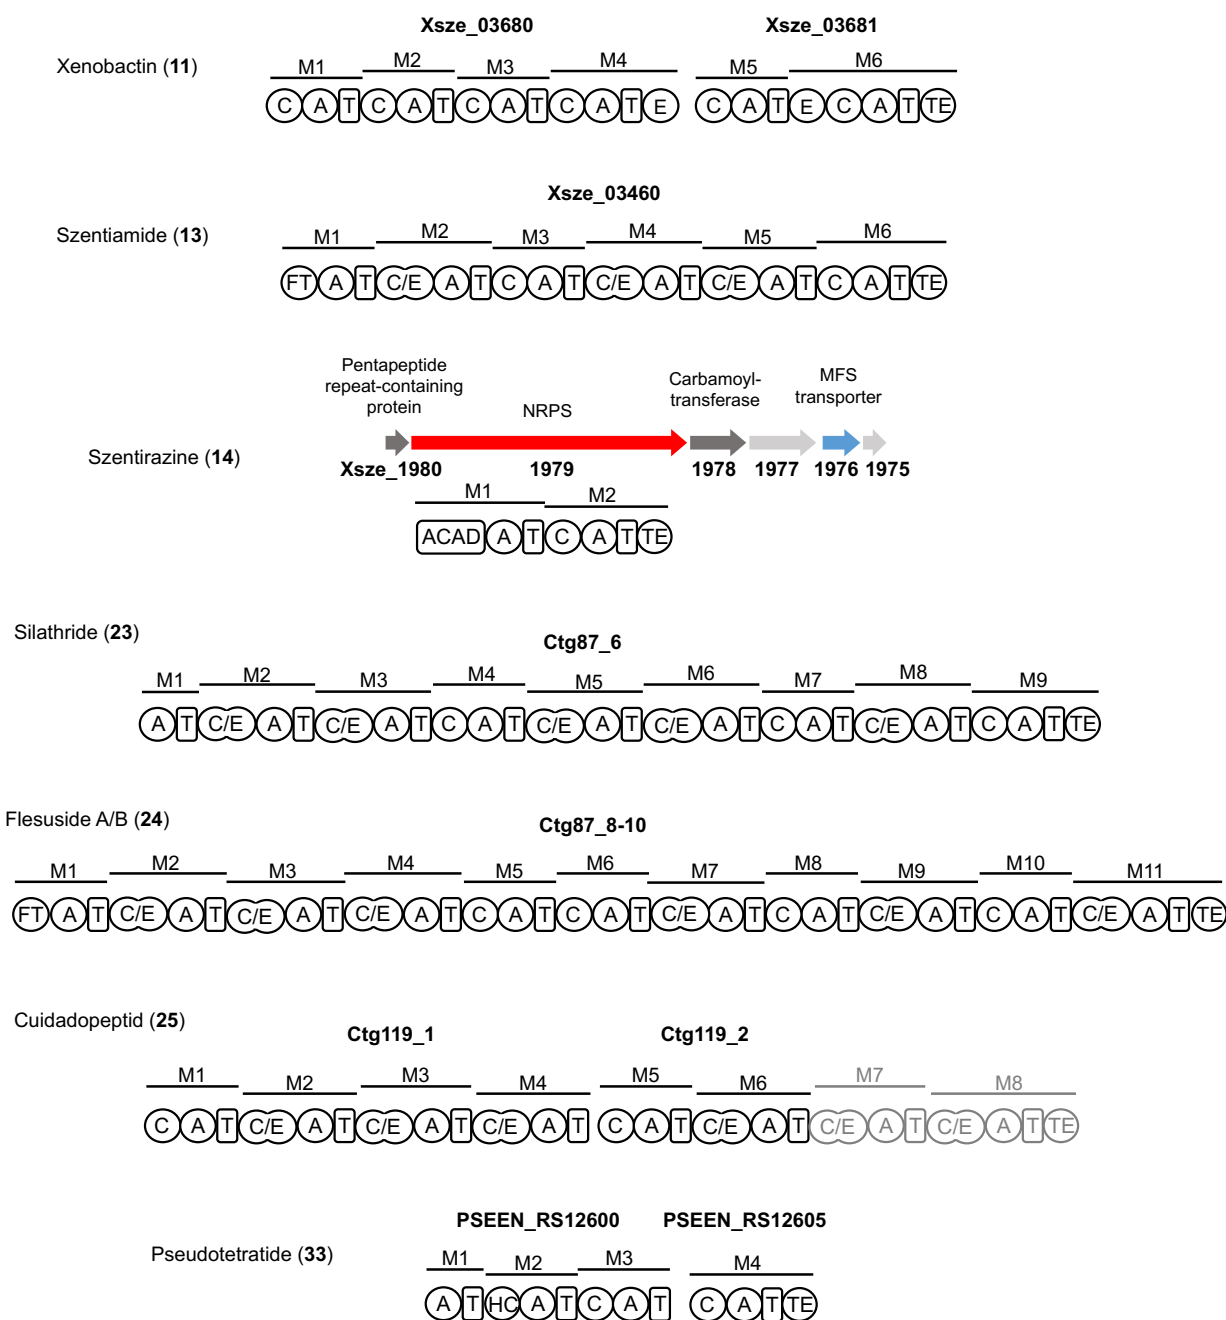

**Supplementary Fig. 3.** New NRPS and BGCs identified in this work. For **25** the C-terminus of the second NRPS was missing due to the BGC location at a contig end. The missing part (shown in grey) was assumed based on synthesis of all possible isomers (Supplementary Fig. 16c). Domain explanation: Condensation (C), dual condensation/epimerization (C/E), adenylation (A), thiolation (T), thioesterase (TE), formyltransferase (FT), heterocyclization (HC), acyl-CoA dehydrogenase (ACAD). Modules (M) are also shown.

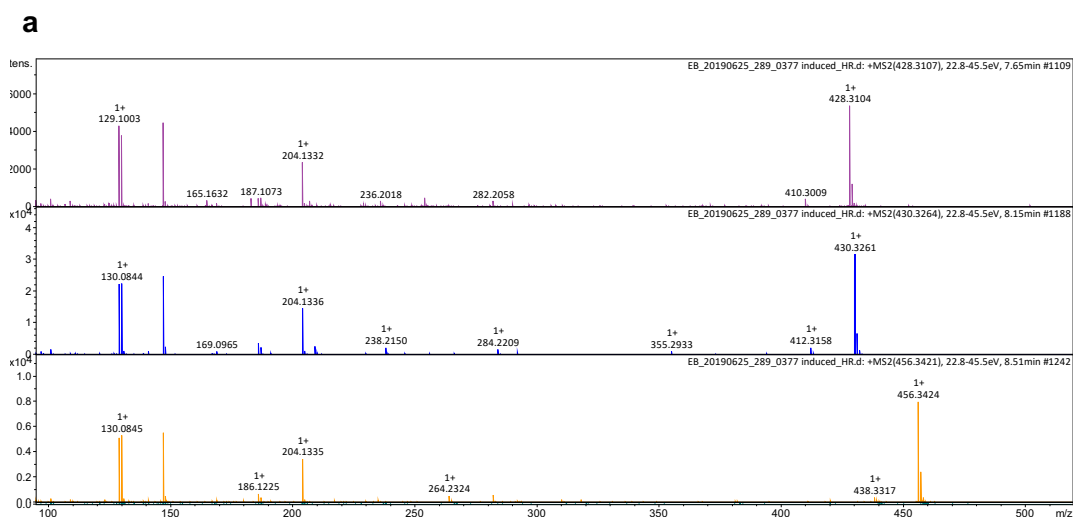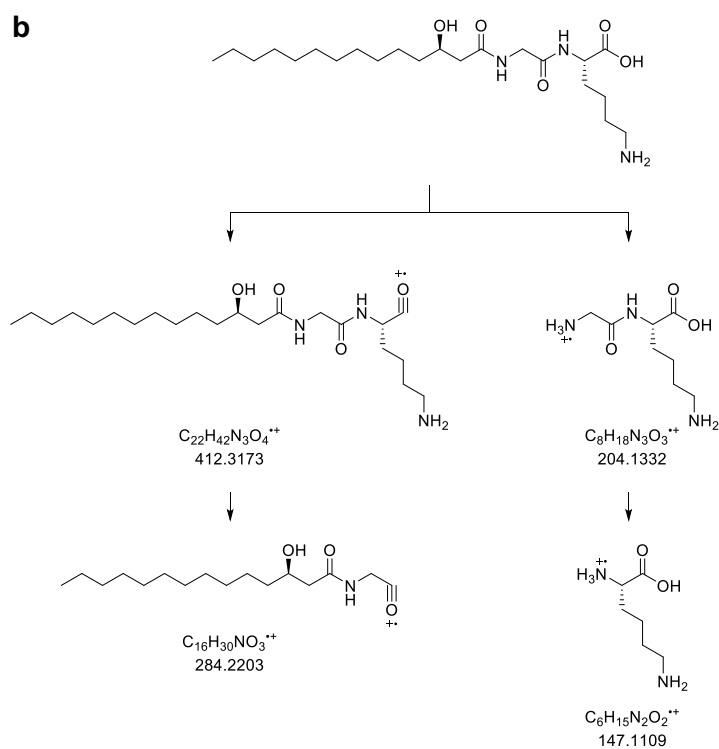

**Supplementary Fig. 4.** MS-MS analysis of **15a-c**. **a**, MS2-spectra of all identified derivatives. **b**, proposed fragmentation of **15b**.

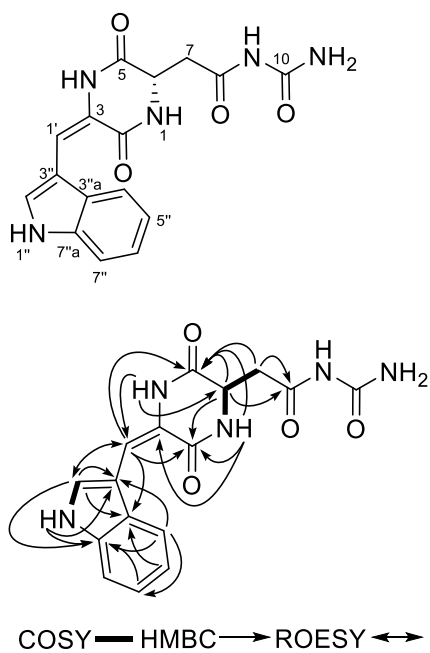

**Supplementary Fig. 5.** Structure and key 2D NMR correlations of **14**.

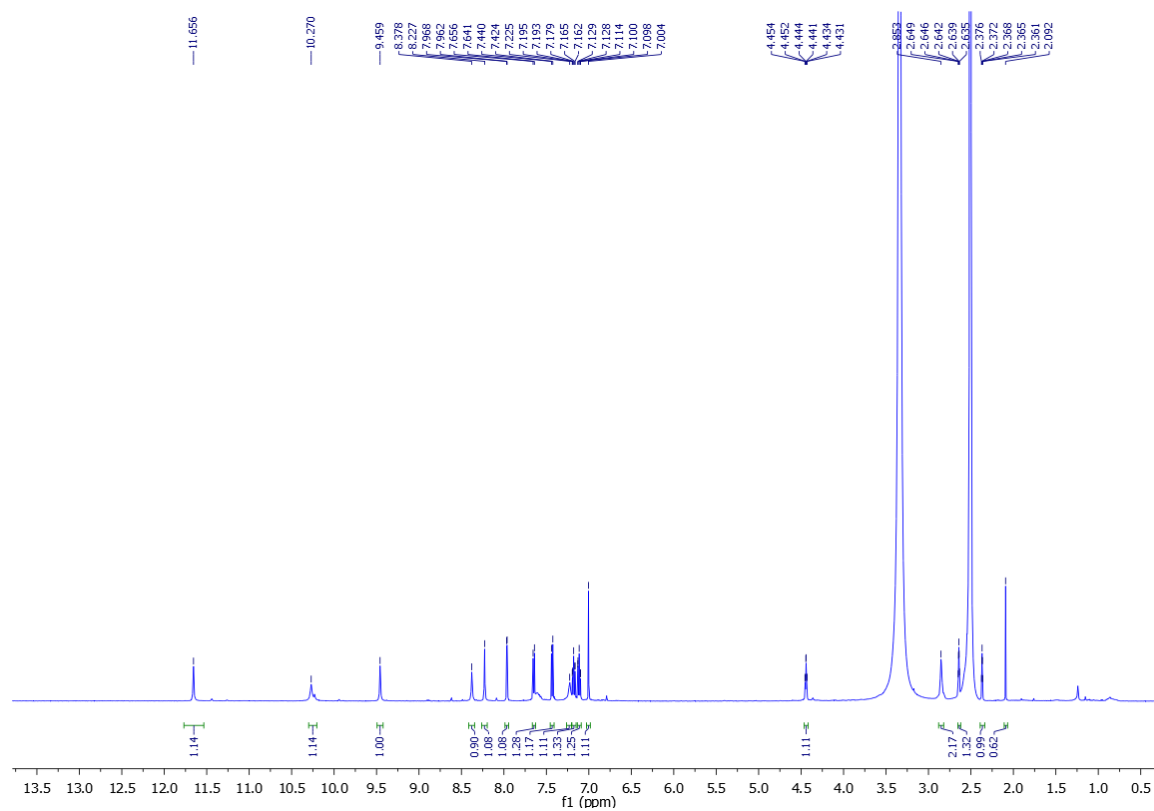

**Supplementary Fig. 6.**  $^1\text{H}$  NMR spectrum of compound **14**.

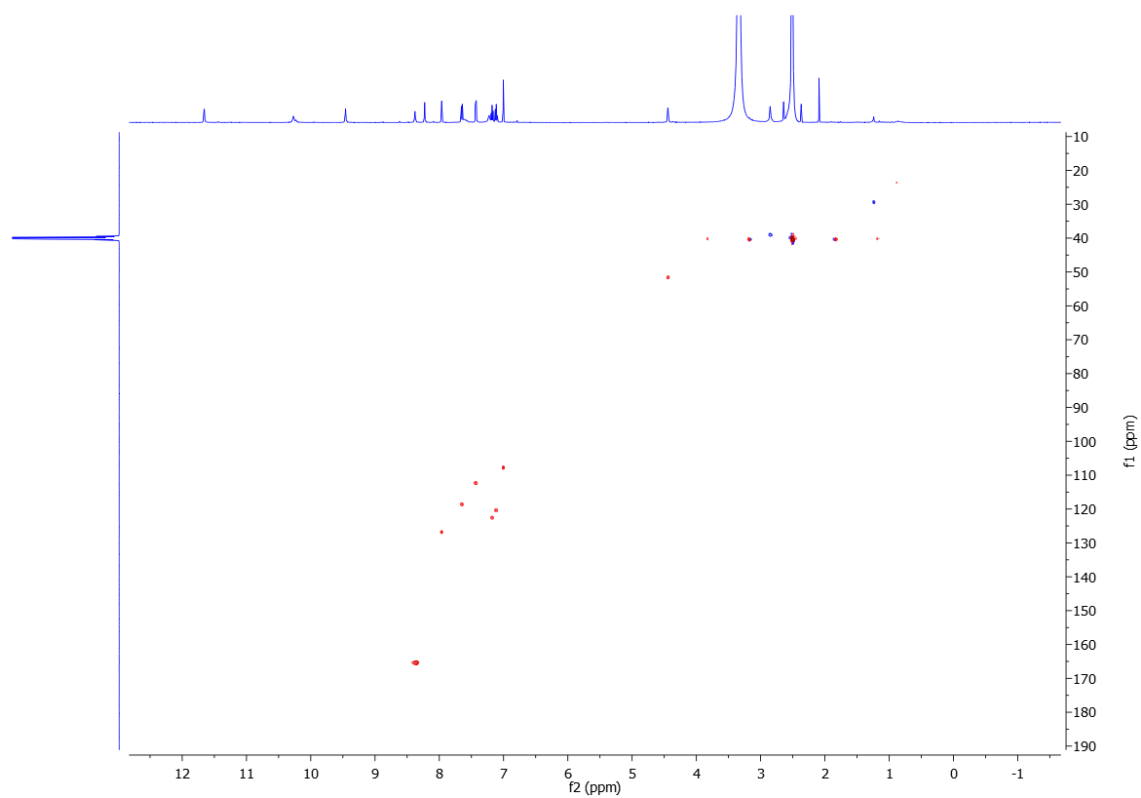

**Supplementary Fig. 7.** HSQC spectrum of compound **14**.

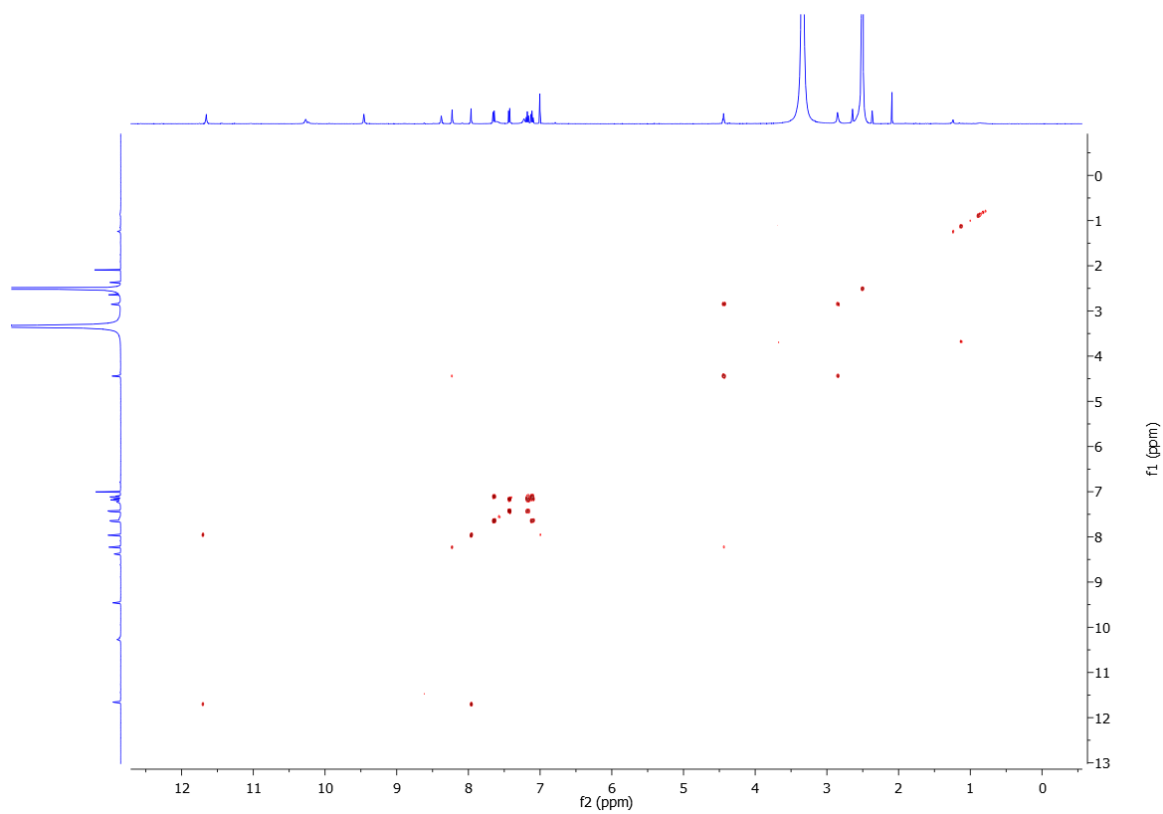

**Supplementary Fig. 8.** COSY spectrum of compound **14**.

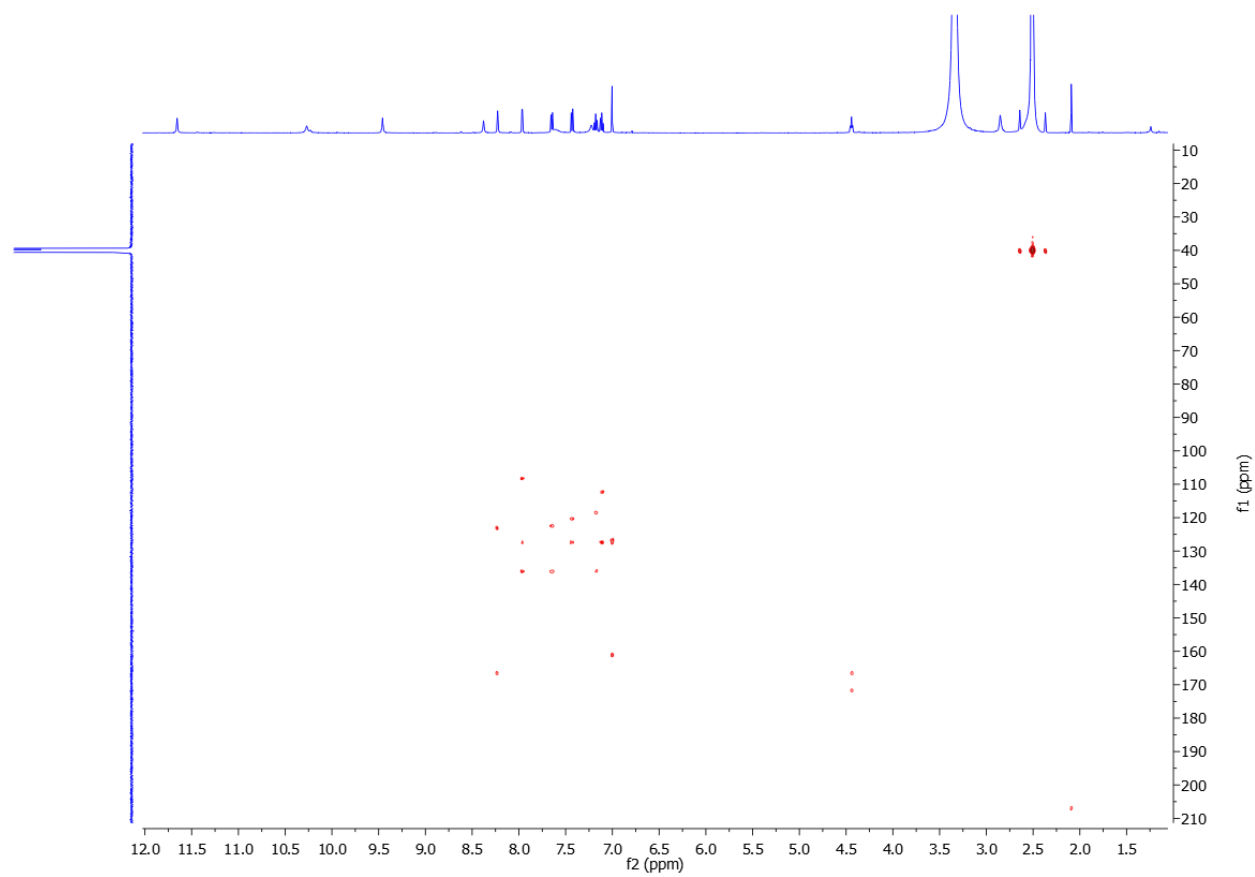

**Supplementary Fig. 9.** HMBC spectrum of compound **14**.

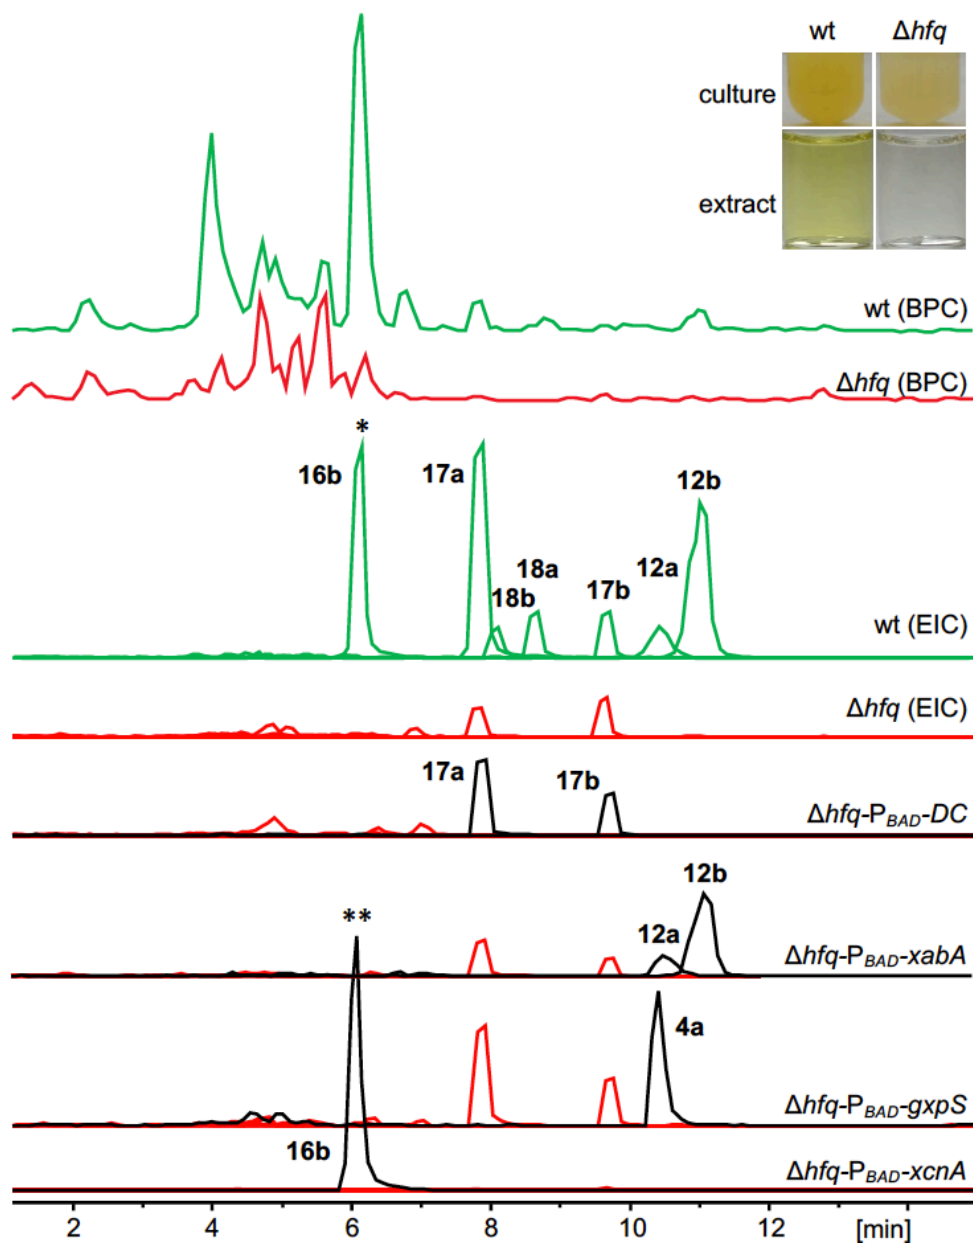

**Supplementary Fig. 10.** HPLC/MS data of wt and  $\Delta hfq$  mutant of *X. doucetiae* and NPs detected after promoter exchange in the  $\Delta hfq$  mutant. For better readability, overlaid Extracted Ion Chromatograms (EICs) of all NPs are shown clearly revealing the desired NPs upon promoter exchange. (\* and \*\*: 10- and 20-fold reduction in size).

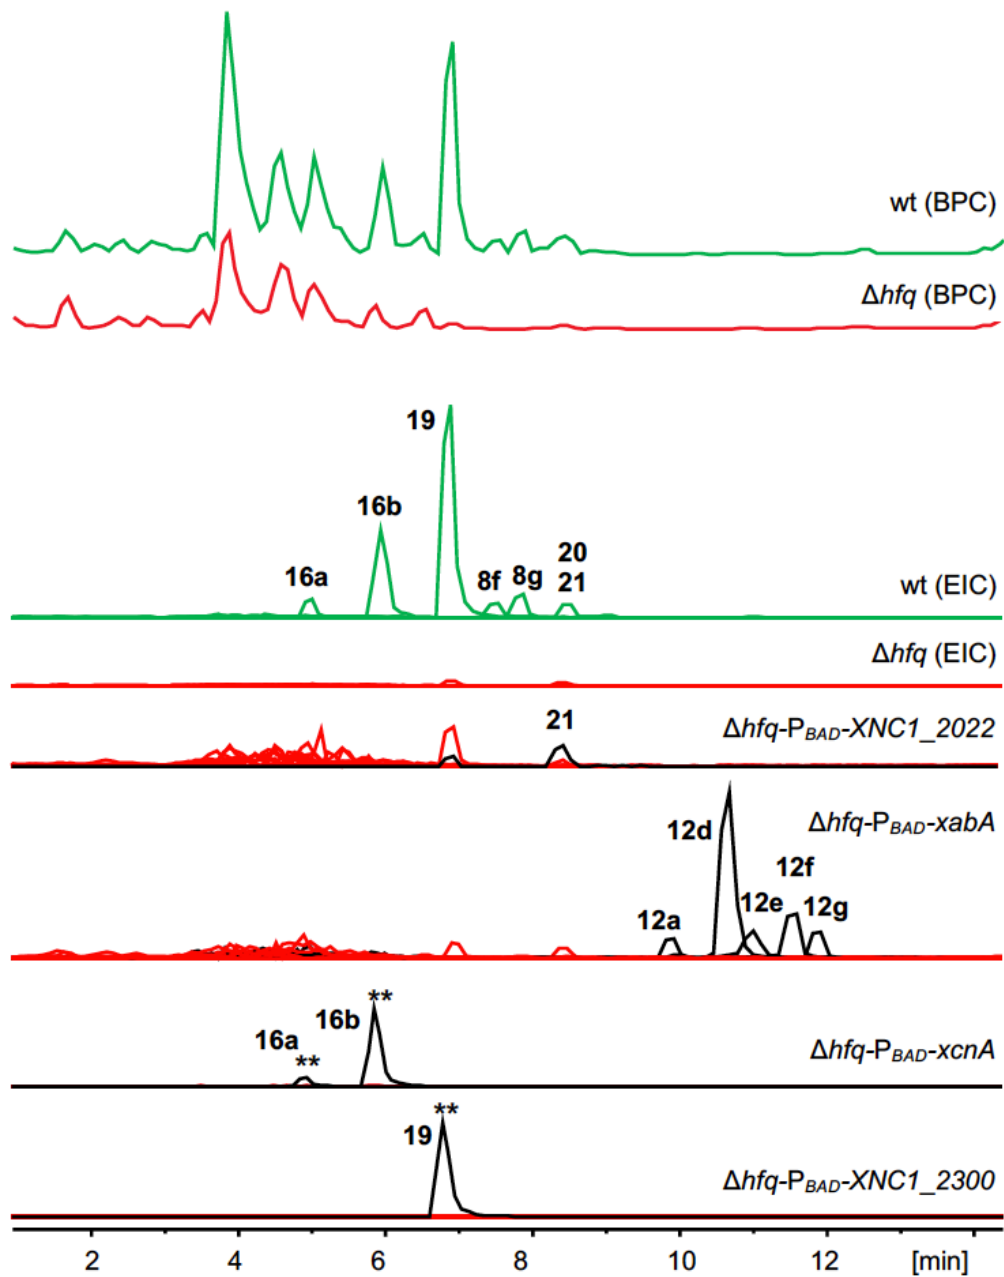

**Supplementary Fig. 11.** HPLC/MS data of wt and  $\Delta hfq$  mutant of *X. nematophila* and NPs detected after promoter exchange in the  $\Delta hfq$  mutant. For better readability, overlaid Extracted Ion Chromatograms (EICs) of all NPs are shown clearly revealing the desired NPs upon promoter exchange. (\*\* 10-fold reduction in size).

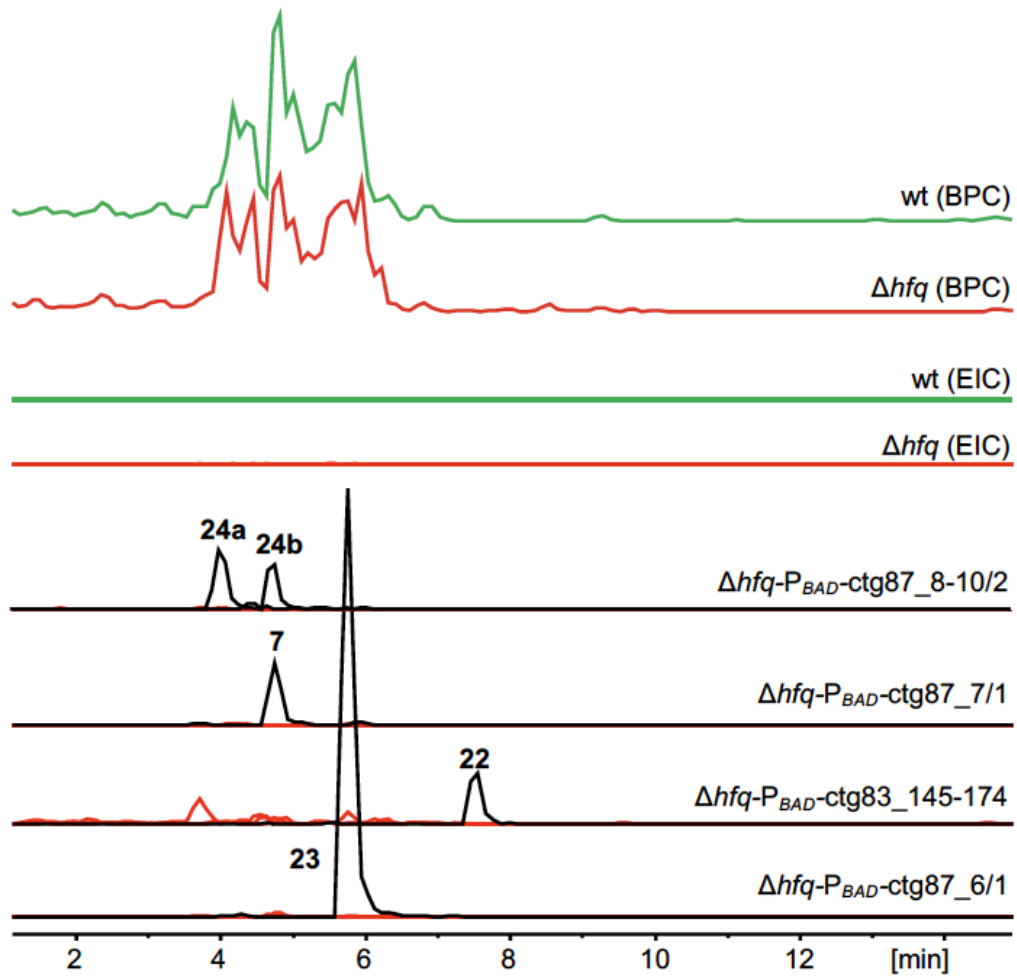

**Supplementary Fig. 12.** HPLC/MS data of *wt* and  $\Delta hfq$  mutant of *Photobacterium* PB45.5 and NPs detected after promoter exchange in the  $\Delta hfq$  mutant. For better readability, overlaid Extracted Ion Chromatograms (EICs) of all NPs are shown clearly revealing the desired NPs upon promoter exchange.



**a**

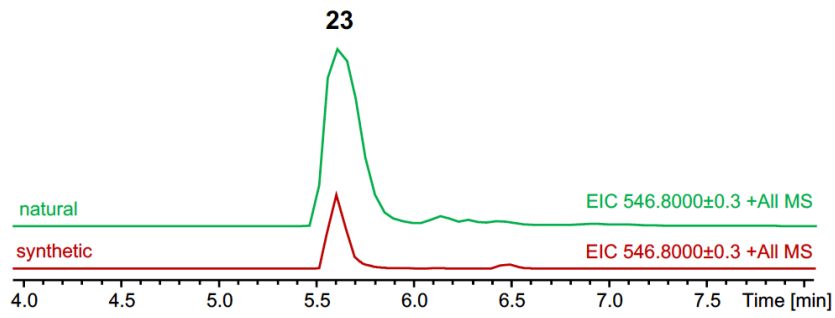

**b**

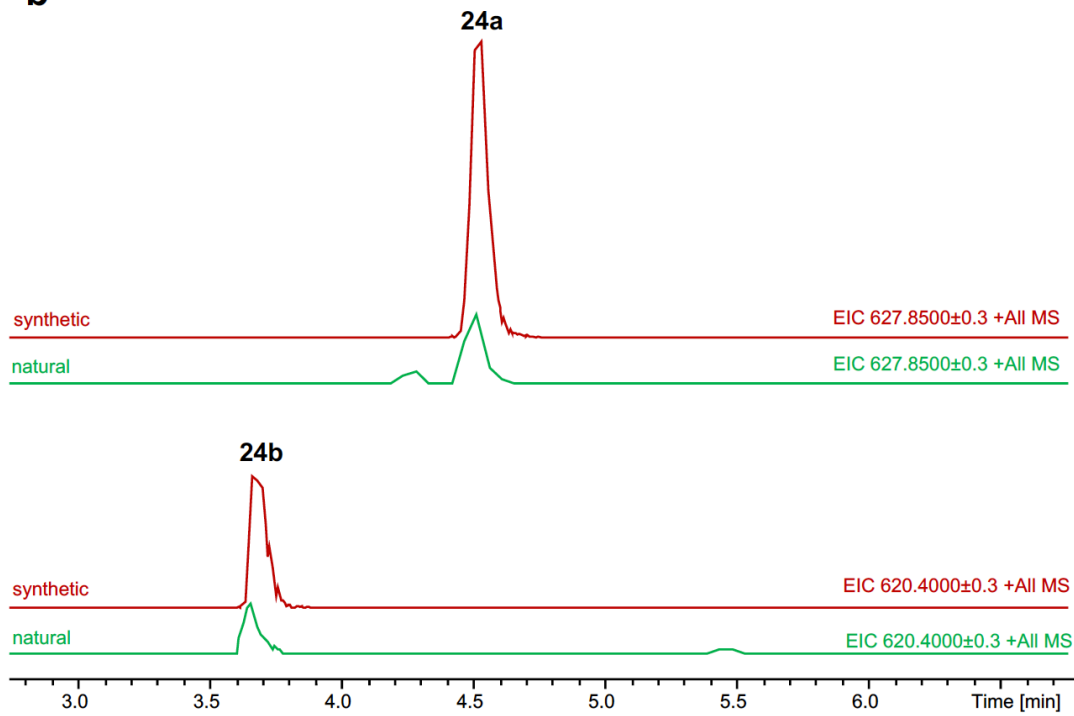

**Supplementary Fig. 13.** HPLC/MS analysis of synthetic (red) and natural (green) peptides **23** and **24** confirming their identical retention times and thus their absolute configurations.

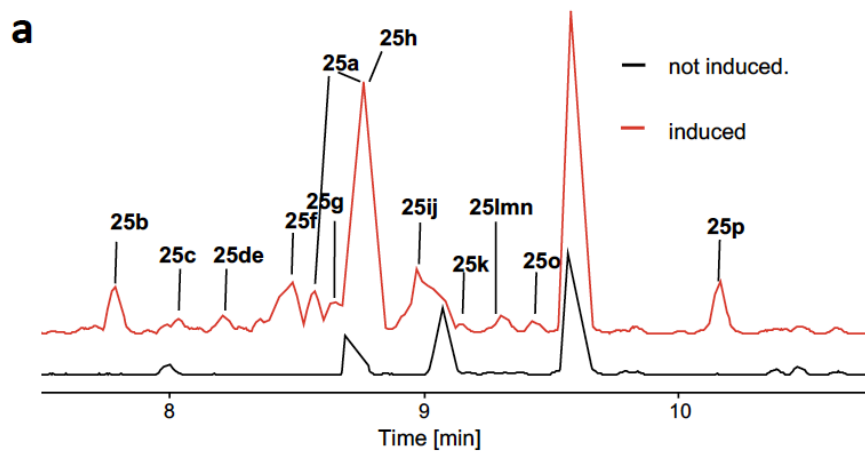

**b**

|                     |                             |                             |                             |                             |                             |
|---------------------|-----------------------------|-----------------------------|-----------------------------|-----------------------------|-----------------------------|
| Derivative          | <b>25b</b>                  | <b>25c</b>                  | <b>25d</b>                  | <b>25e</b>                  | <b>25f</b>                  |
| $m/z$ $[M+2H]^{2+}$ | 414.3                       | 421.3                       | 611.4                       | 635.4                       | 618.4                       |
| RT (min)            | 7.9                         | 8.06                        | 8.3                         | 8.3                         | 8.6                         |
| Sum formula         | $C_{41}H_{80}N_8O_9$        | $C_{42}H_{82}N_8O_9$        | $C_{62}H_{102}N_{12}O_{13}$ | $C_{66}H_{102}N_{12}O_{13}$ | $C_{63}H_{104}N_{12}O_{13}$ |
| Derivative          | <b>25a</b>                  | <b>25g</b>                  | <b>25h</b>                  | <b>25i</b>                  | <b>25j</b>                  |
| $m/z$ $[M+2H]^{2+}$ | 625.4                       | 631.4                       | 608.4                       | 615.4                       | 632.4                       |
| RT (min)            | 8.8                         | 8.67                        | 8.8                         | 8.98                        | 8.98                        |
| Sum formula         | $C_{64}H_{106}N_{12}O_{13}$ | $C_{65}H_{106}N_{12}O_{13}$ | $C_{61}H_{106}N_{12}O_{13}$ | $C_{62}H_{110}N_{12}O_{13}$ | $C_{65}H_{108}N_{12}O_{13}$ |
| Derivative          | <b>25k/25l</b>              | <b>25m</b>                  | <b>25n</b>                  | <b>25o</b>                  | <b>25p</b>                  |
| $m/z$ $[M+2H]^{2+}$ | 617.9                       | 622.4                       | 639.4                       | 652.4                       | 617.9                       |
| RT (min)            | 9.34                        | 9.4                         | 9.4                         | 9.6                         | 10.18                       |
| Sum formula         | n.d.                        | $C_{63}H_{112}N_{12}O_{13}$ | $C_{66}H_{110}N_{12}O_{13}$ | $C_{68}H_{112}N_{12}O_{13}$ | n.d.                        |

**Supplementary Fig. 14.** HPLC/MS (BPC) of *Xenorhabdus* KJ12.1  $\Delta$ hfq\_PBAD\_02330 cultivated in LB without (black) and with arabinose induction (red) (**a**) and data for cuidoapeptide derivatives (**25**) observed (main derivative **25a** highlighted).

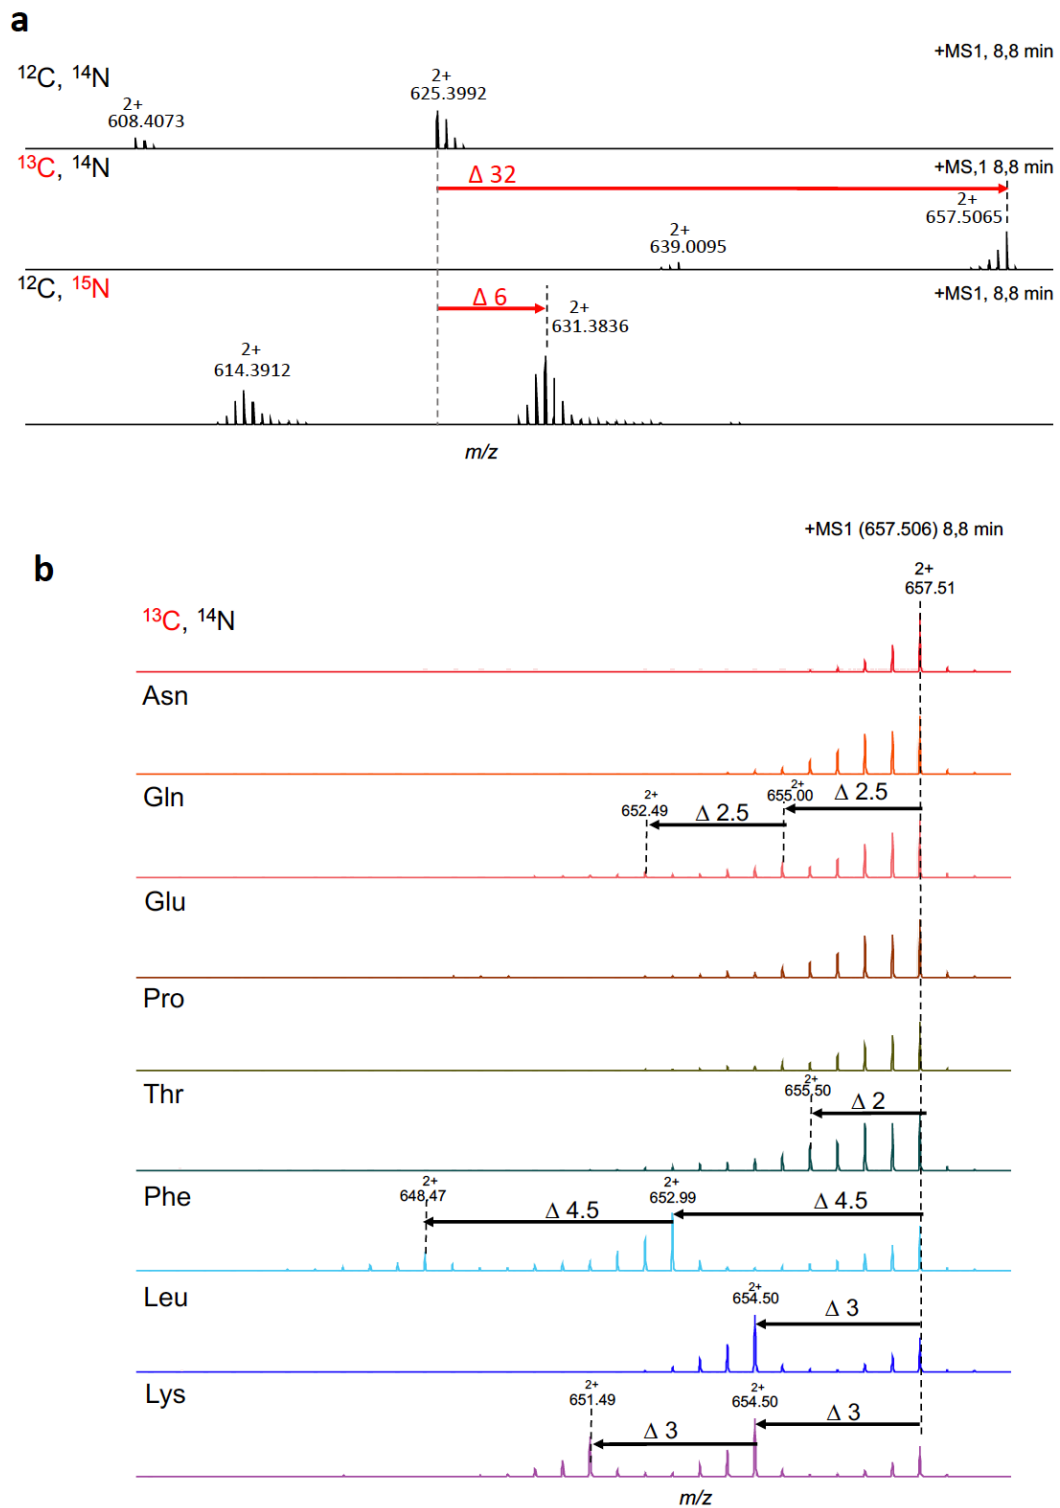

**Supplementary Fig. 15.** MS data from *Xenorhabdus* KJ12.1  $\Delta$ hfq\_PBAD\_02330 producing **25a** grown in different media (fully labelled  $^{12}\text{C}^{14}\text{N}$ ,  $^{12}\text{C}^{15}\text{N}$ , or  $^{13}\text{C}^{14}\text{N}$ ) for the determination of carbon and nitrogen numbers (**a**) and amino acid building blocks determined from feeding non-labelled amino acids in cultures grown in  $^{13}\text{C}$  medium (**b**).

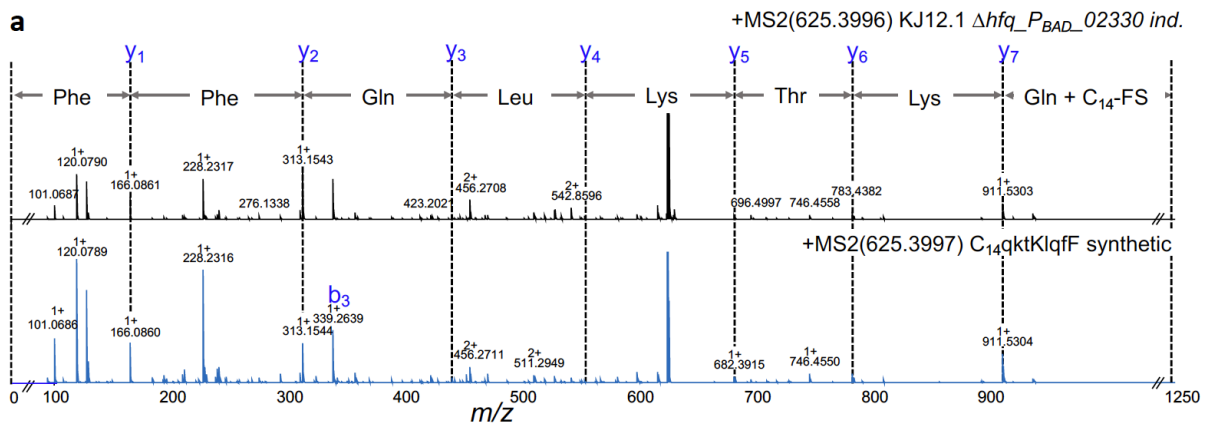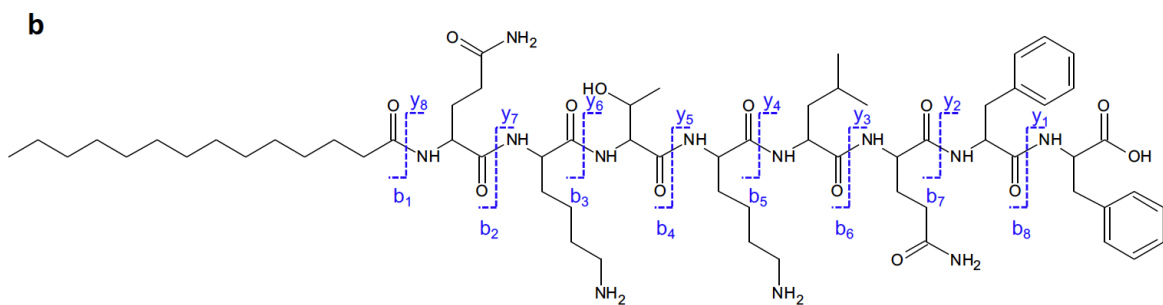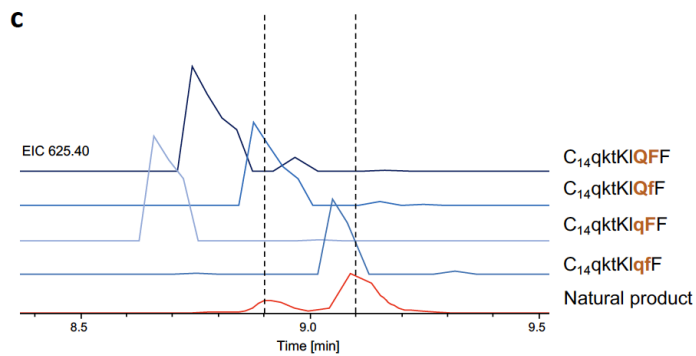

**Supplementary Fig. 16.** MS-MS Fragmentation of **25a** produced by *Xenorhabdus* KJ12.1  $\Delta hfq\_P_{BAD\_02330}$  and compared to synthetic **25a** (a), proposed fragmentation pattern (b), and comparison of the retention time of synthetic and natural **25a** (c).

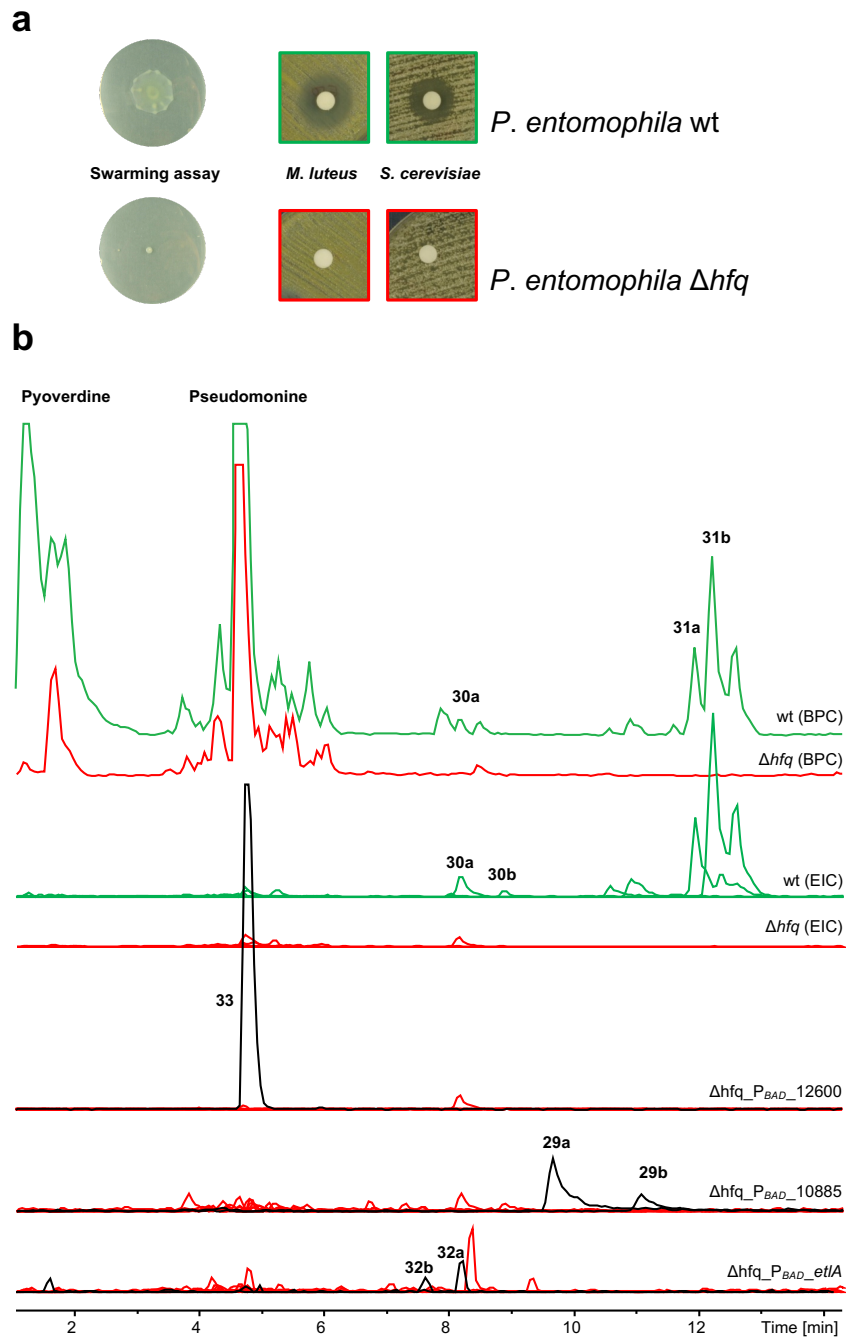

**Supplementary Fig. 17.** HPLC/MS data of wt and  $\Delta hfq$  mutant of *Pseudomonas entomophila* and NPs detected after promoter exchange in the  $\Delta hfq$  mutant. For better readability, overlaid Extracted Ion Chromatograms (EICs) of all NPs are shown clearly revealing the desired NPs upon promoter exchange. In the  $\Delta hfq$  mutant the two siderophores pyoverdine and pseudomonine were still detected but were left out in the EIC representation for better readability. EIC traces for **29** and **32** were increased 10-fold.

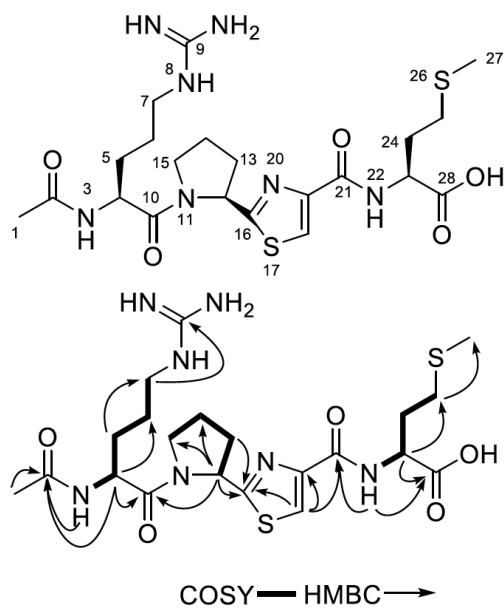

**Supplementary Fig. 18.** Structure and key 2D NMR correlations of **33**.

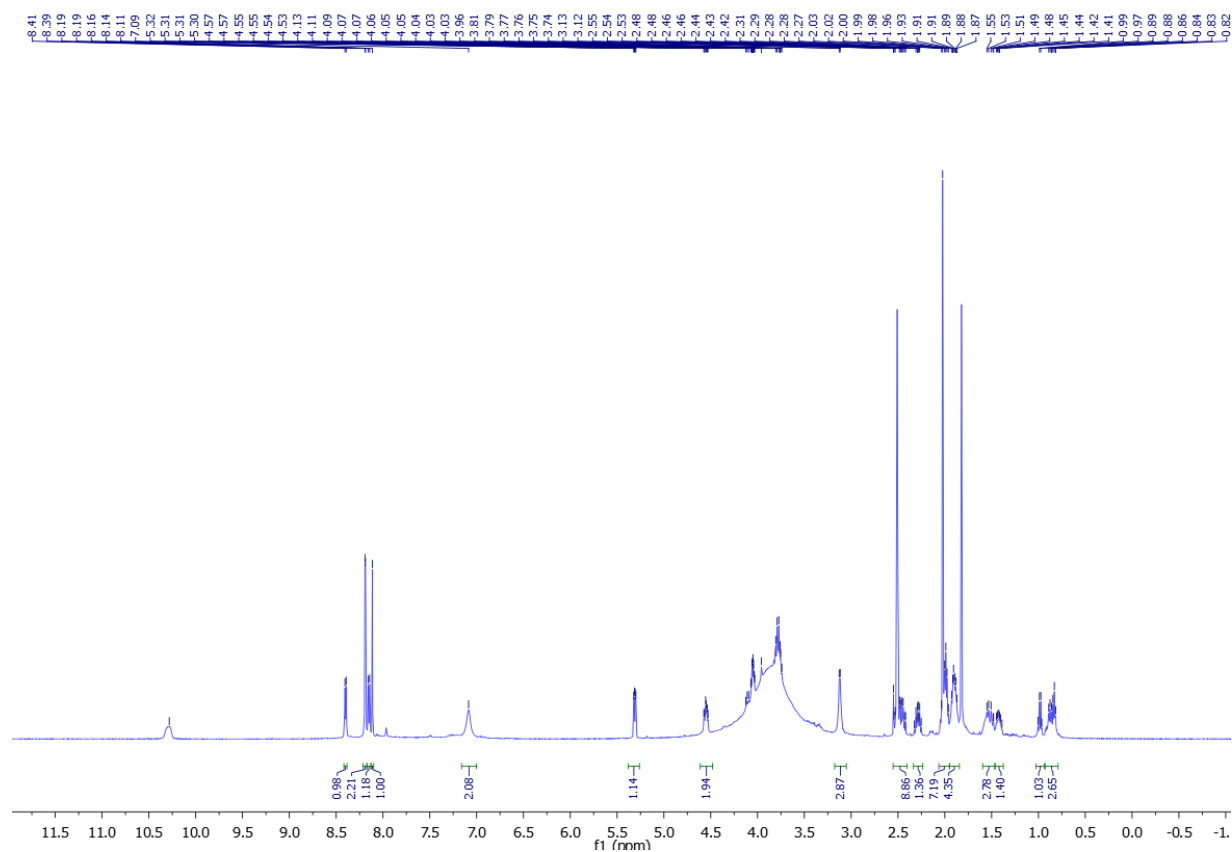

**Supplementary Fig. 19.**  $^1\text{H}$  NMR spectrum of compound **33**.

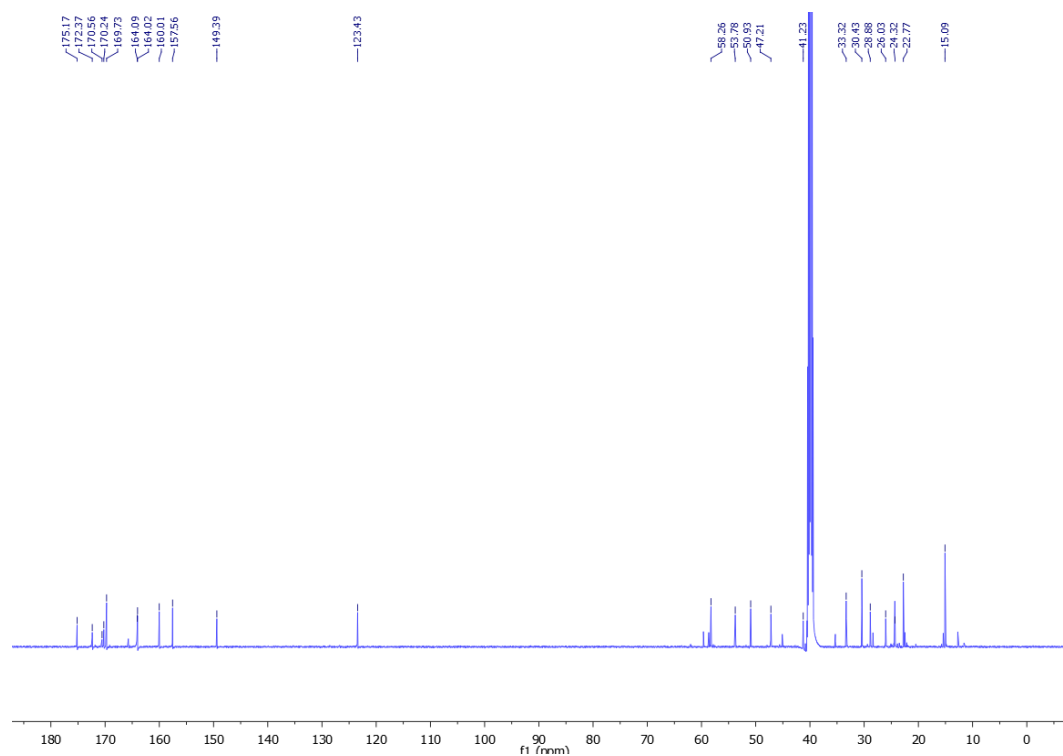

**Supplementary Fig. 20.**  $^{13}\text{C}$  NMR spectrum of compound **33**.

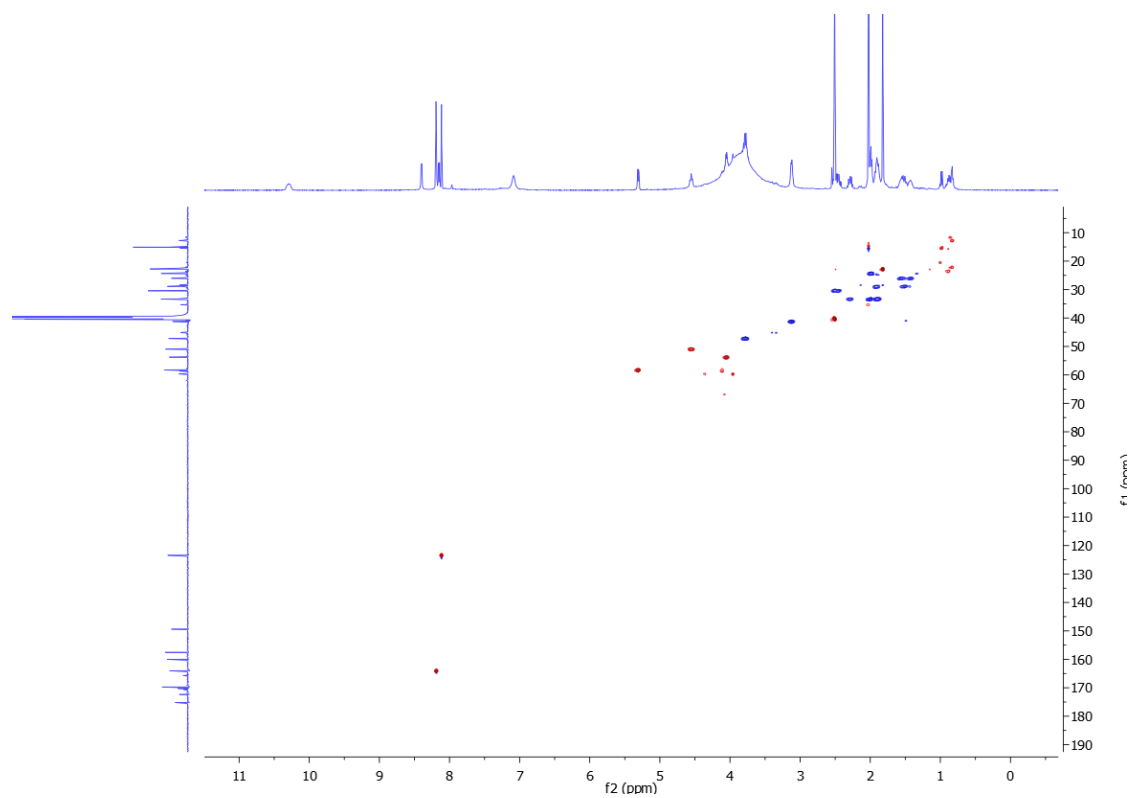

**Supplementary Fig. 21.** HSQC spectrum of compound **33**.

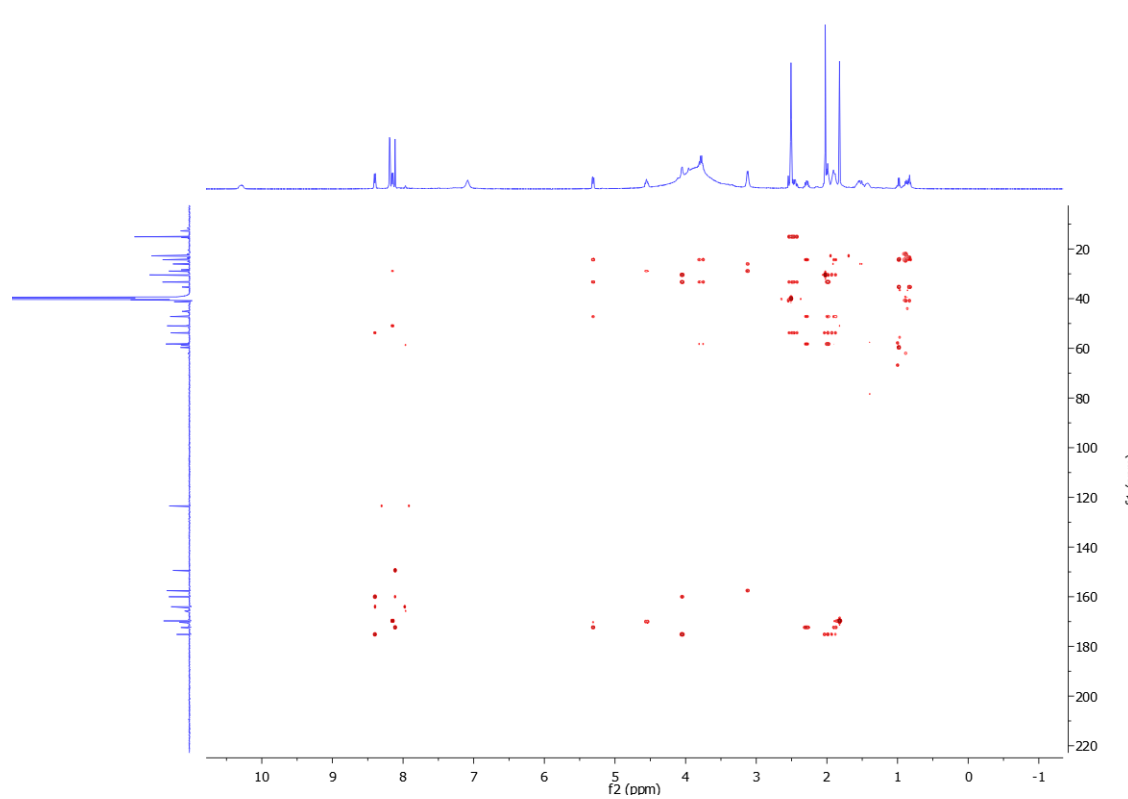

**Supplementary Fig. 22.** HMBC spectrum of compound **33**.

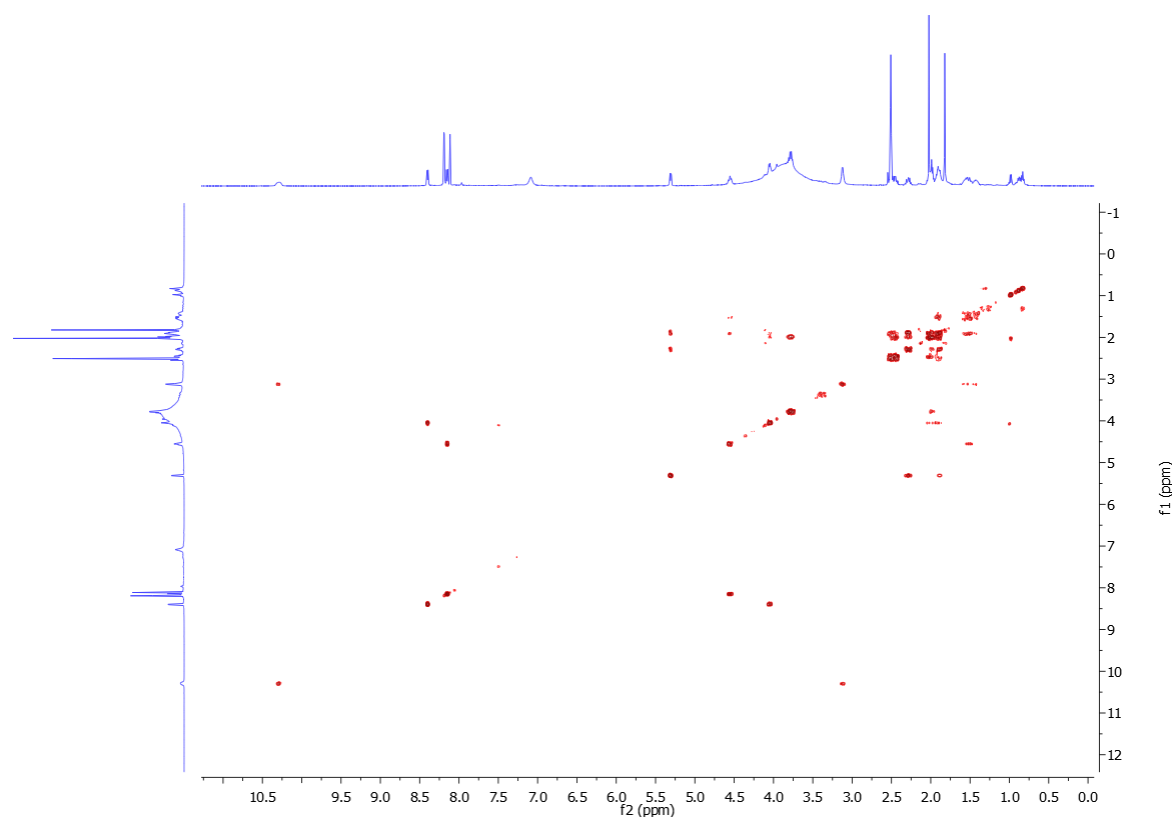

**Supplementary Fig. 23.** COSY spectrum of compound **33**.



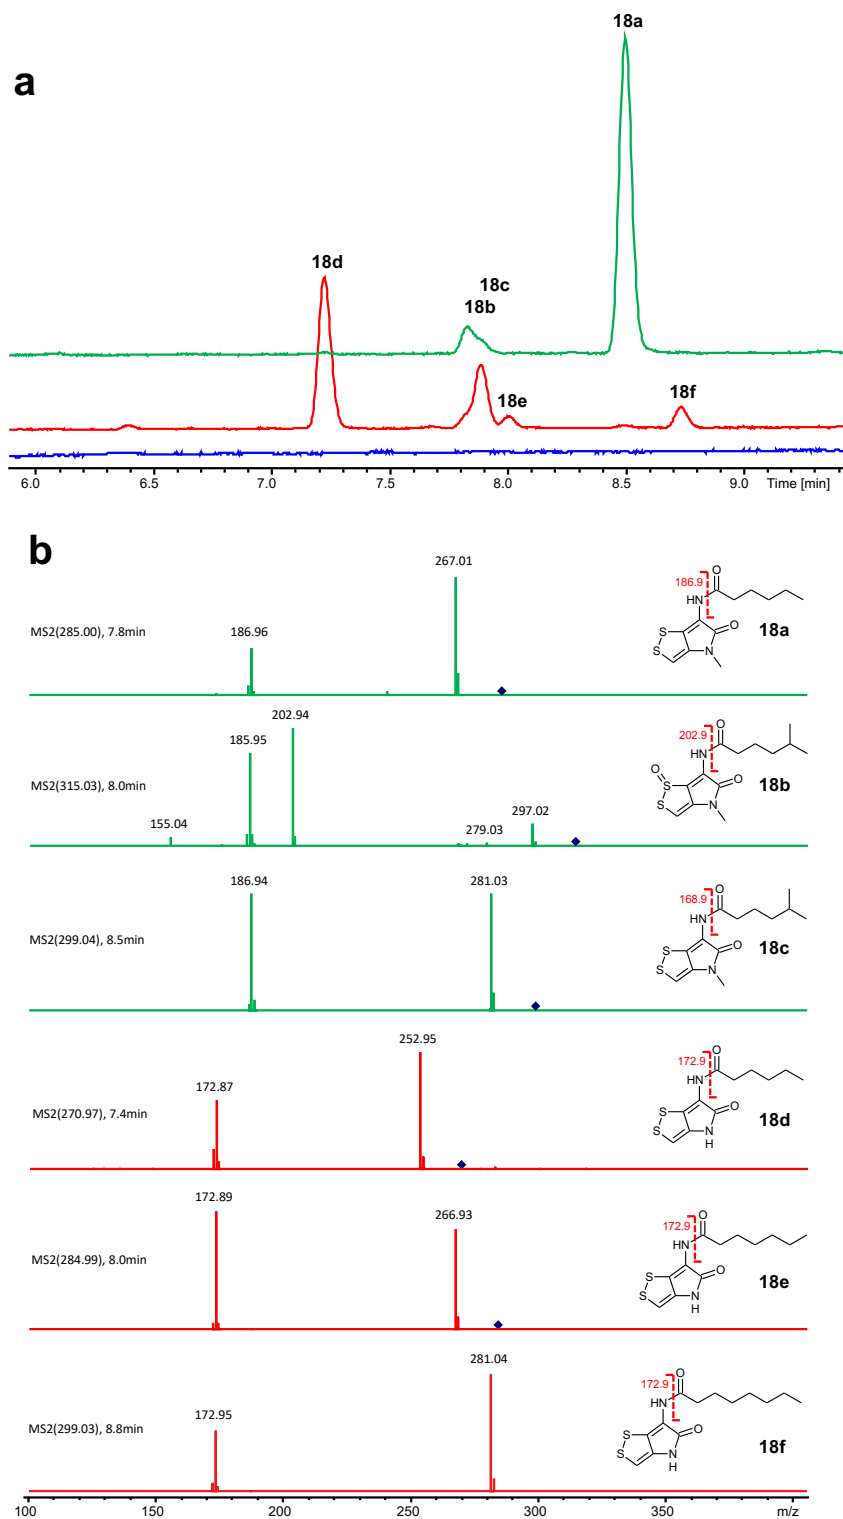

**Supplementary Fig. 24. a**, HPLC/UV analysis of xenorhabdins derived from *X. doucetiae* wt (green)(**18a-c**), induced *X. doucetiae*  $\Delta hfq-xrdA$  mutant (red)(**18d-f**) and non-induced *X. doucetiae*  $\Delta hfq-xrdA$  mutant (blue). **b**, MS-MS analysis of the identified derivatives indicating characteristic fragments.

## References

- [1] N. J. Tobias, A. K. Heinrich, H. Eresmann, P. R. Wright, N. Neubacher, R. Backofen, H. B. Bode, *Environ Microbiol* **2017**, *19*, 119–129.
- [2] C. Fu, W. P. Donovan, O. Shikapwashya-Hasser, X. Ye, R. H. Cole, *PLoS ONE* **2014**, *9*, e115318–20.
- [3] L. R. Hmelo, B. R. Borlee, H. Almblad, M. E. Love, T. E. Randall, B. S. Tseng, C. Lin, Y. Irie, K. M. Storek, J. J. Yang, et al., *Nat Protoc* **2015**, *10*, 1820–1841.
- [4] E. Bode, A. O. Brachmann, C. Kegler, R. Simsek, C. Dauth, Q. Zhou, M. Kaiser, P. Klemmt, H. B. Bode, *ChemBioChem* **2015**, *16*, 1115–1119.
- [5] S. Thoma, M. Schobert, *FEMS Microbiol Lett* **2009**, *294*, 127–132.
- [6] N. J. Tobias, H. Wolff, B. Djahanschiri, F. Grundmann, M. Kronenwerth, Y.-M. Shi, S. Simonyi, P. Grün, D. Shapiro-Ilan, S. J. Pidot, et al., *Nature Microbiology* **2017**, *2*, 1676–1685.
- [7] D. Sørensen, T. O. Larsen, C. Christophersen, P. H. Nielsen, U. Anthoni, *Phytochemistry* **1999**, *51*, 1181–1183.
- [8] S. W. Fuchs, A. Proschak, T. W. Jaskolla, M. Karas, H. B. Bode, *Org. Biomol. Chem.* **2011**, *9*, 3130–3132.
- [9] C. J. Balibar, F. H. Vaillancourt, C. T. Walsh, *Chem. Biol.* **2005**, *12*, 1189–1200.
- [10] K. Blin, S. Shaw, K. Steinke, R. Villebro, N. Ziemert, S. Y. Lee, M. H. Medema, T. Weber, *Nucleic Acids Res.* **2019**, *47*, W81–W87.
- [11] J. Leach, B. R. Lang, O. Y. Microbiology, 1982, *J. Gen. Microbiol.* **1982**, *128*, 1719–1729.
- [12] S. Hazir, D. I. Shapiro-Ilan, C. H. Bock, C. Hazir, L. G. Leite, M. W. Hotchkiss, *European Journal of Plant Pathology* **2016**, *146*, 1–13.
- [13] X. L. Fang, Z. Z. Li, Y. H. Wang, X. Zhang, *J Appl Microbiol* **2011**, *111*, 145–154.
- [14] E. Matuschek, D. F. J. Brown, G. Kahlmeter, *Clinical Microbiology and Infection* **2014**, *20*, O255–O266.
- [15] C. L. Kurz, S. Chauvet, E. Andrès, M. Aurouze, I. Vallet, G. P. F. Michel, M. Uh, J. Celli, A. Filloux, S. De Bentzmann, et al., *EMBO J.* **2003**, *22*, 1451–1460.
- [16] S. Brenner, *Genetics* **1974**, *77*, 71–94.
- [17] I. Cakmak, H. Baspinar, N. MADANLAR, *Turk J Agric For* **2005**, *29*, 259–265.
- [18] I. Cakmak, A. Janssen, M. W. Sabelis, H. Baspinar, *Biological Control* **2009**, *50*, 60–65.
- [19] D. I. Quiros, D. A. Emmen, E. Dominguez, M. V. Heller, P. D. Coley, T. A. Kursar, *International Journal of Pest Management* **2006**, *52*, 333–342.
- [20] E. W. Ades, F. J. Candal, R. A. Swerlick, V. G. George, S. Summers, D. C. Bosse, T. J. Lawley, *Journal of Investigative Dermatology* **1992**, *99*, 683–690.
- [21] P. Griess, *Berichte der deutschen chemischen Gesellschaft* **1879**, *12*, 426–428.
- [22] A. O. Brachmann, S. A. Joyce, H. Jenke-Kodama, G. Schwär, D. J. Clarke, H. B. Bode, *ChemBioChem* **2007**, *8*, 1721–1728.
- [23] J. Li, G. Chen, H. Wu, J. M. Webster, *Appl Environ Microbiol* **1995**, *61*, 4329–4333.
- [24] S. A. Joyce, A. O. Brachmann, I. Glazer, L. Lango, G. Schwär, D. J. Clarke, H. B. Bode, *Angew. Chem. Int. Ed. Engl.* **2008**, *47*, 1942–1945.
- [25] F. I. Nollmann, A. K. Heinrich, A. O. Brachmann, C. Morisseau, K. Mukherjee, Á. M. Casanova-Torres, F. Strobl, D. Kleinhans, S. Kinski, K. Schultz, et al., *ChemBioChem* **2015**, *16*, 766–771.

- [26] H. B. Bode, D. Reimer, S. W. Fuchs, F. Kirchner, C. Dauth, C. Kegler, W. Lorenzen, A. O. Brachmann, P. Grün, *Chem. Eur. J.* **2012**, *18*, 2342–2348.
- [27] F. I. Nollmann, C. Dauth, G. Mulley, C. Kegler, M. Kaiser, N. R. Waterfield, H. B. Bode, *ChemBioChem* **2015**, *16*, 205–208.
- [28] A. O. Brachmann, S. Brameyer, D. Kresovic, I. Hitkova, Y. Kopp, C. Manske, K. Schubert, H. B. Bode, R. Heermann, *Nat Chem Biol* **2013**, *9*, 573–578.
- [29] A. Dudnik, L. Bigler, R. Dudler, *Microbiol Res* **2013**, *168*, 73–76.
- [30] C. M. Theodore, J. B. King, J. You, R. H. Cichewicz, *J. Nat. Prod.* **2012**, *75*, 2007–2011.
- [31] G. Wang, Z. Zhao, J. Ke, Y. Engel, Y.-M. Shi, *Nature Microbiology* **n.d.**
- [32] D. Reimer, K. N. Cowles, A. Proschak, F. I. Nollmann, A. J. Dowling, M. Kaiser, R. F. Constant, H. Goodrich-Blair, H. B. Bode, *ChemBioChem* **2013**, *14*, 1991–1997.
- [33] X. Cai, S. Nowak, F. Wesche, I. Bischoff, M. Kaiser, R. Fürst, H. B. Bode, *Nat Chem* **2017**, *9*, 379–386.
- [34] A. O. Brachmann, S. Forst, G. M. Furgani, A. Fodor, H. B. Bode, *J. Nat. Prod.* **2006**, *69*, 1830–1832.
- [35] O. Schimming, V. L. Challinor, N. J. Tobias, H. Adihou, P. Grün, L. Pöschel, C. Richter, H. Schwalbe, H. B. Bode, *Angewandte Chemie* **2015**, *127*, 12893–12896.
- [36] F. Grundmann, M. Kaiser, M. Kurz, M. Schiell, A. Batzer, H. B. Bode, *RSC Adv.* **2013**, *3*, 22072–22077.
- [37] Q. Zhou, F. Grundmann, M. Kaiser, M. Schiell, S. Gaudriault, A. Batzer, M. Kurz, H. B. Bode, *Chem. Eur. J.* **2013**, *19*, 16772–16779.
- [38] B. Ohlendorf, S. Simon, J. Wiese, J. F. Imhoff, *Nat Prod Commun* **2011**, *6*, 1247–1250.
- [39] F. I. Nollmann, A. Dowling, M. Kaiser, K. Deckmann, S. Grösch, R. French-Constant, H. B. Bode, *Beilstein J. Org. Chem.* **2012**, *8*, 528–533.
- [40] D. Ji, Y. Yi, G.-H. Kang, Y.-H. Choi, P. Kim, N.-I. Baek, Y. Kim, *FEMS Microbiol Lett* **2004**, *239*, 241–248.
- [41] D. Reimer, E. Luxenburger, A. O. Brachmann, H. B. Bode, *ChemBioChem* **2009**, *10*, 1997–2001.
- [42] E. Bode, Y. He, T. D. Vo, R. Schultz, M. Kaiser, H. B. Bode, *Environ Microbiol* **2017**, *19*, 4564–4575.
- [43] B. V. McInerney, R. P. Gregson, M. J. Lacey, R. J. Akhurst, G. R. Lyons, S. H. Rhodes, D. R. Smith, L. M. Engelhardt, A. H. White, *J. Nat. Prod.* **1991**, *54*, 774–784.
- [44] D. Reimer, F. I. Nollmann, K. Schultz, M. Kaiser, H. B. Bode, *J. Nat. Prod.* **2014**, *77*, 1976–1980.
- [45] X. Cai, V. L. Challinor, L. Zhao, D. Reimer, H. Adihou, P. Grün, M. Kaiser, H. B. Bode, *Org. Lett.* **2017**, *19*, 806–809.
- [46] C. Kegler, F. I. Nollmann, T. Ahrendt, F. Fleischhacker, E. Bode, H. B. Bode, *ChemBioChem* **2014**, *15*, 826–828.
- [47] H. B. Bode, A. O. Brachmann, K. B. Jadhav, L. Seyfarth, C. Dauth, S. W. Fuchs, M. Kaiser, N. R. Waterfield, H. Sack, S. H. Heinemann, et al., *Angew. Chem. Int. Ed. Engl.* **2015**, *54*, 10352–10355.
- [48] J. M. Crawford, C. Portmann, X. Zhang, M. B. J. Roeffaers, J. Clardy, *Proc. Natl. Acad. Sci. U.S.A.* **2012**, *109*, 10821–10826.
- [49] S. W. Fuchs, F. Grundmann, M. Kurz, M. Kaiser, H. B. Bode, *ChemBioChem* **2014**, *15*, 512–516.

- [50] M. Klapper, S. Götze, R. Barnett, K. Willing, P. Stallforth, *Angewandte Chemie* **2016**, *128*, 9090–9093.
- [51] F. Grundmann, V. Dill, A. Dowling, A. Thanwisai, E. Bode, N. Chantratita, R. ffrench-Constant, H. B. Bode, *Beilstein J. Org. Chem.* **2012**, *8*, 749–752.
- [52] A. Broberg, J. Bjerketorp, P. Andersson, C. Sahlberg, J. Levenfors, *Molecules* **2017**, *22*, 1072–9.
- [53] I. Vallet-Gély, A. Novikov, L. Augusto, P. Liehl, G. Bolbach, M. Péchy-Tarr, P. Cosson, C. Keel, M. Caroff, B. Lemaitre, *Appl Environ Microbiol* **2010**, *76*, 910–921.
- [54] M. Fischer-Le Saux, V. Viallard, B. Brunel, P. Normand, N. E. Boemare, *Int. J. Syst. Bacteriol.* **1999**, *49 Pt 4*, 1645–1656.
- [55] N. J. Tobias, B. Mishra, D. K. Gupta, R. Sharma, M. Thines, T. P. Stinear, H. B. Bode, *BMC Genomics* **2016**, *17*, 537.
- [56] P. Tailliez, S. Pages, N. Ginibre, N. Boemare, *Int J Syst Evol Microbiol* **2006**, *56*, 2805–2818.
- [57] E. I. Vivas, H. Goodrich-Blair, *J. Bacteriol.* **2001**, *183*, 4687–4693.
- [58] M. Gualtieri, J.-C. Ogier, S. Pages, A. Givaudan, S. Gaudriault, *Genome Announcements* **2014**, *2*, DOI 10.1128/genomeA.00190-14.
- [59] N. Vodovar, D. Vallenet, S. Cruveiller, Z. Rouy, V. Barbe, C. Acosta, L. Cattolico, C. Jubin, A. Lajus, B. Segurens, et al., *Nat Biotechnol* **2006**, *24*, 673–679.
